# Supplementary material for: Polymorphous low-grade neuroepithelial tumor of the young with FGFR3-TACC3 fusion mimicking high-grade glioma: case report and series of high-grade correlates
Source: Frontiers journal article supplement (doi:10.3389/fonc.2023.1307591), 2023-11-21

Supplementary Figure 1 – TERT and CDKN2A alterations

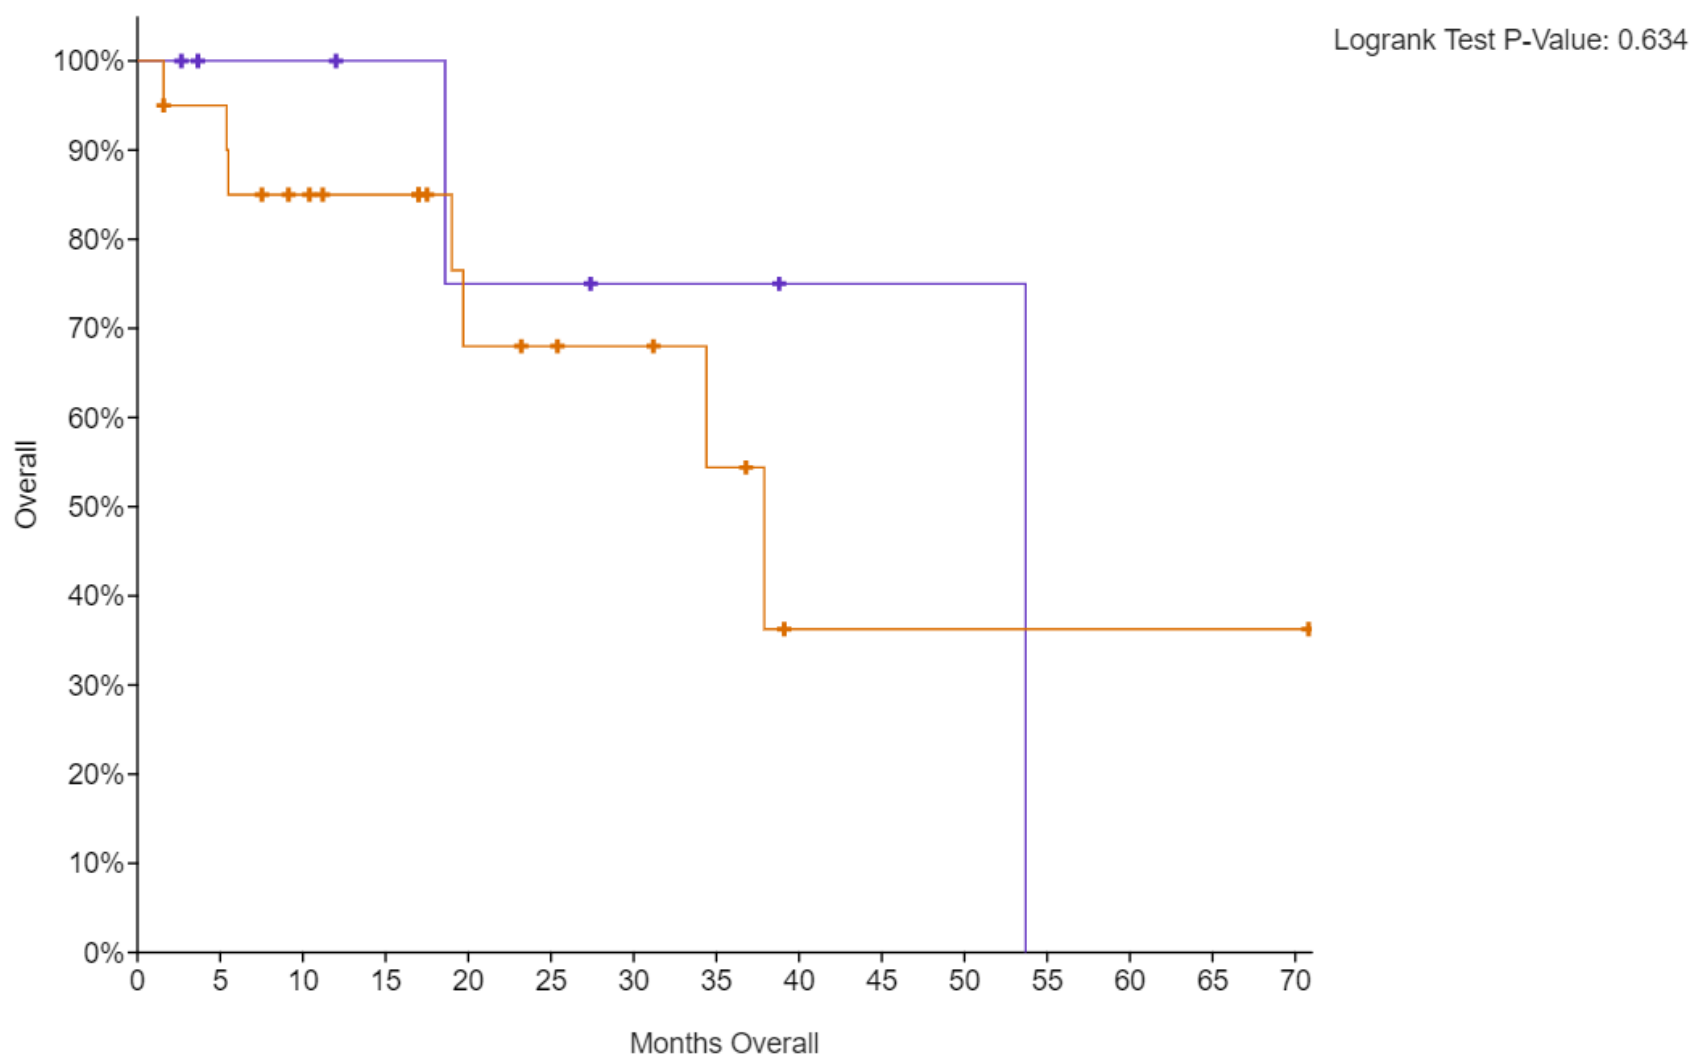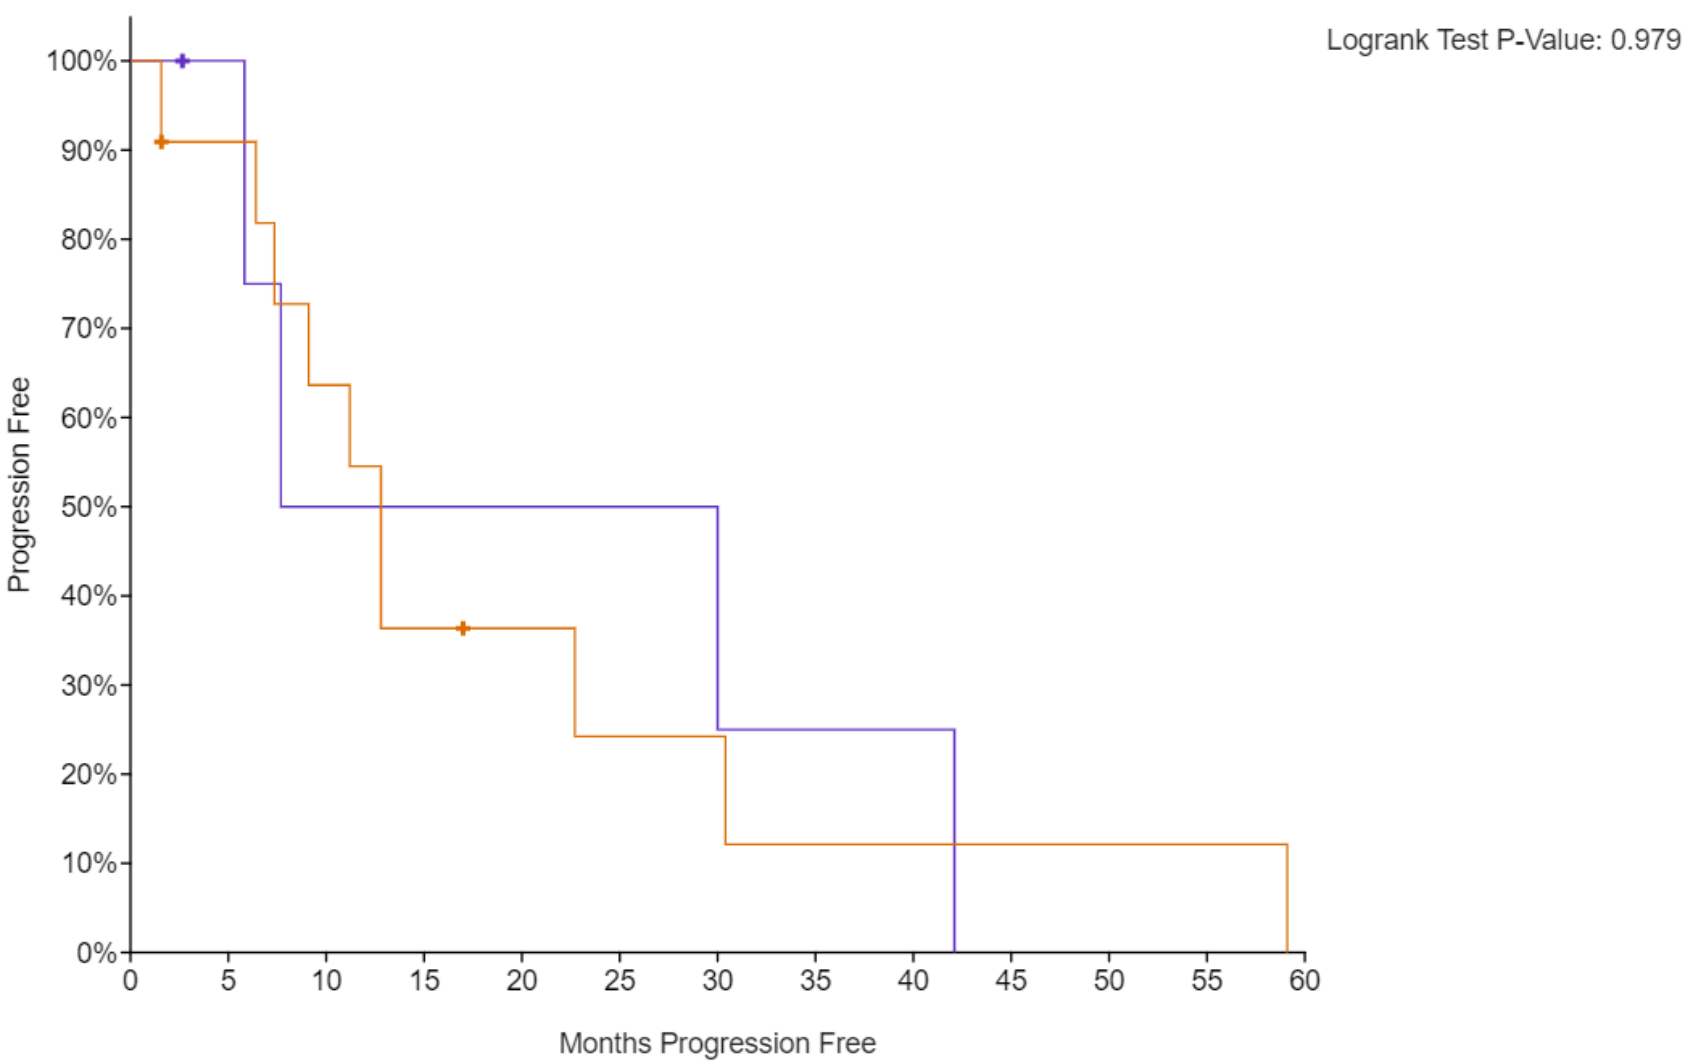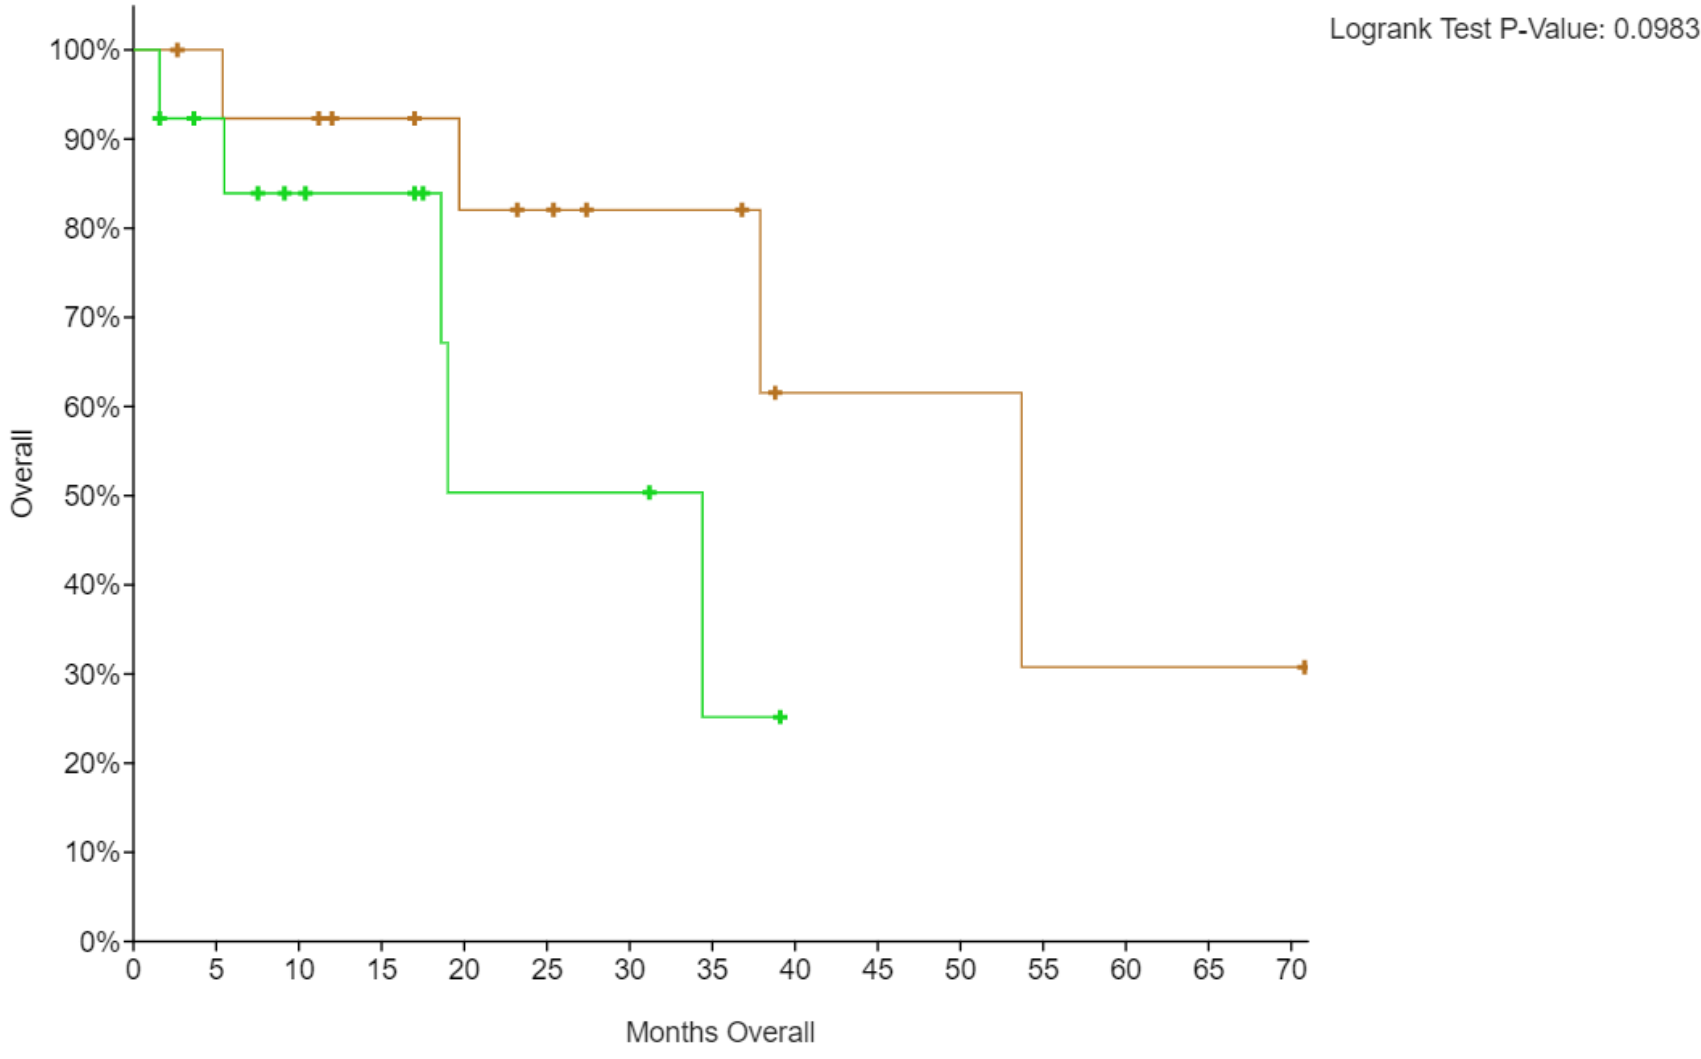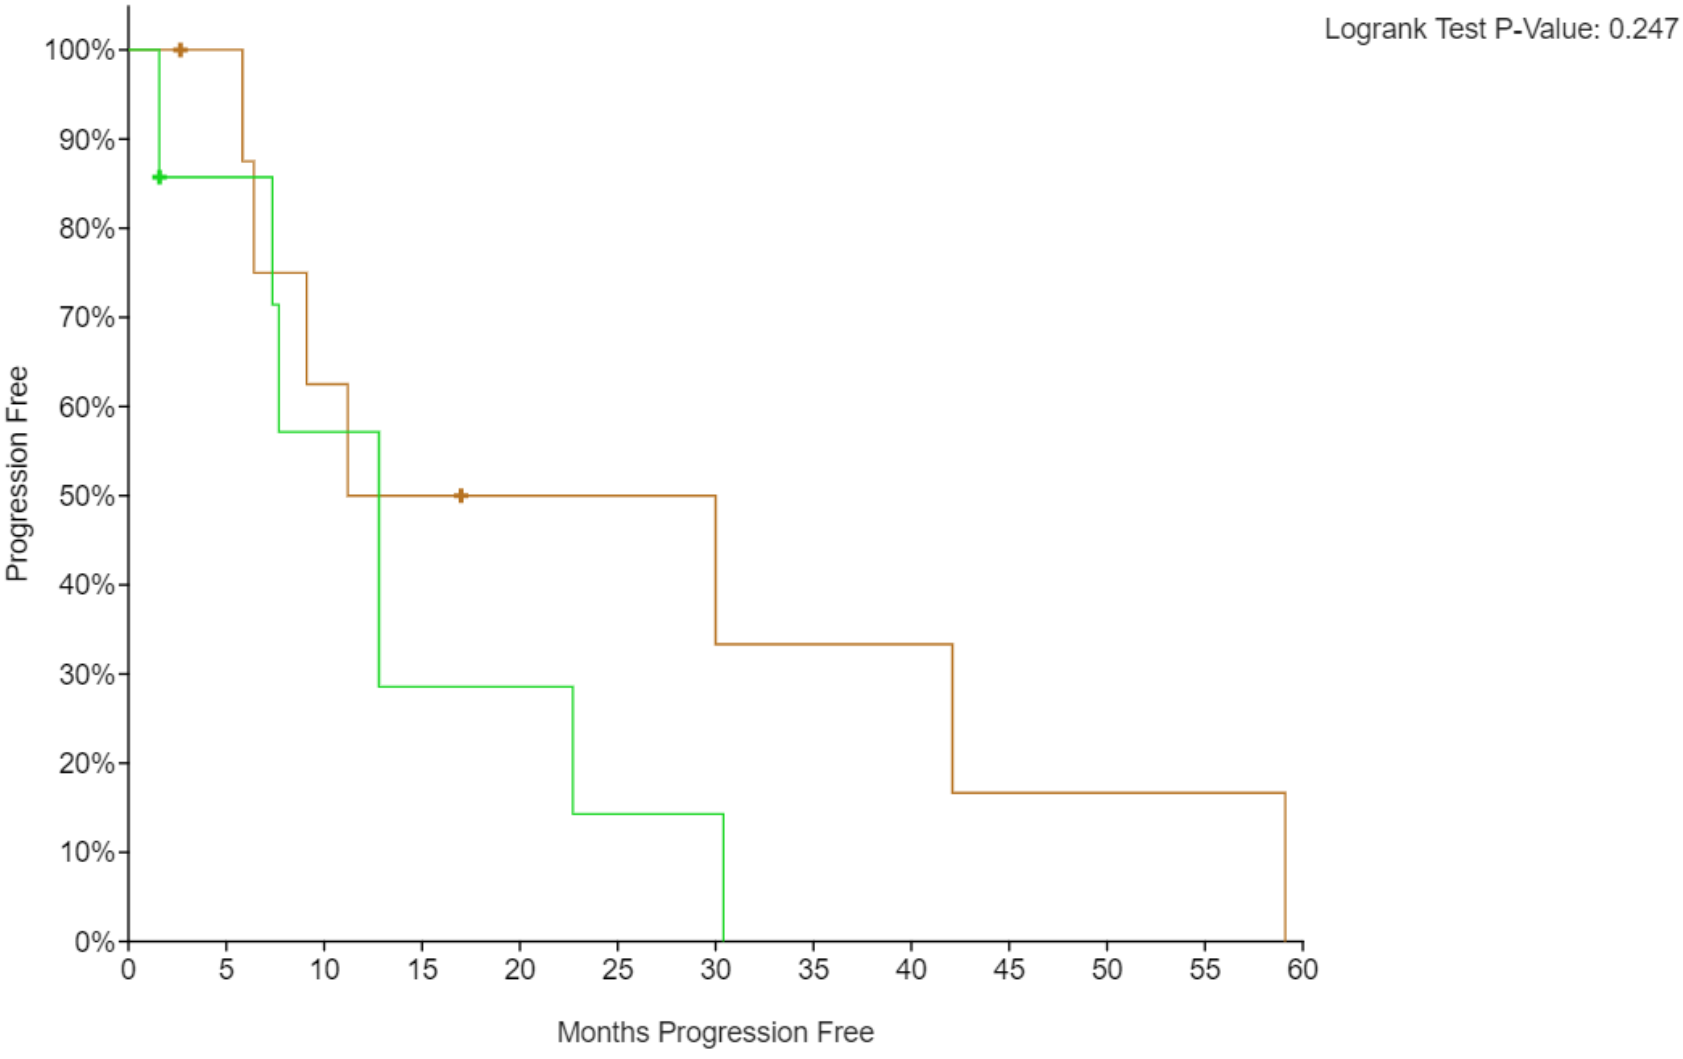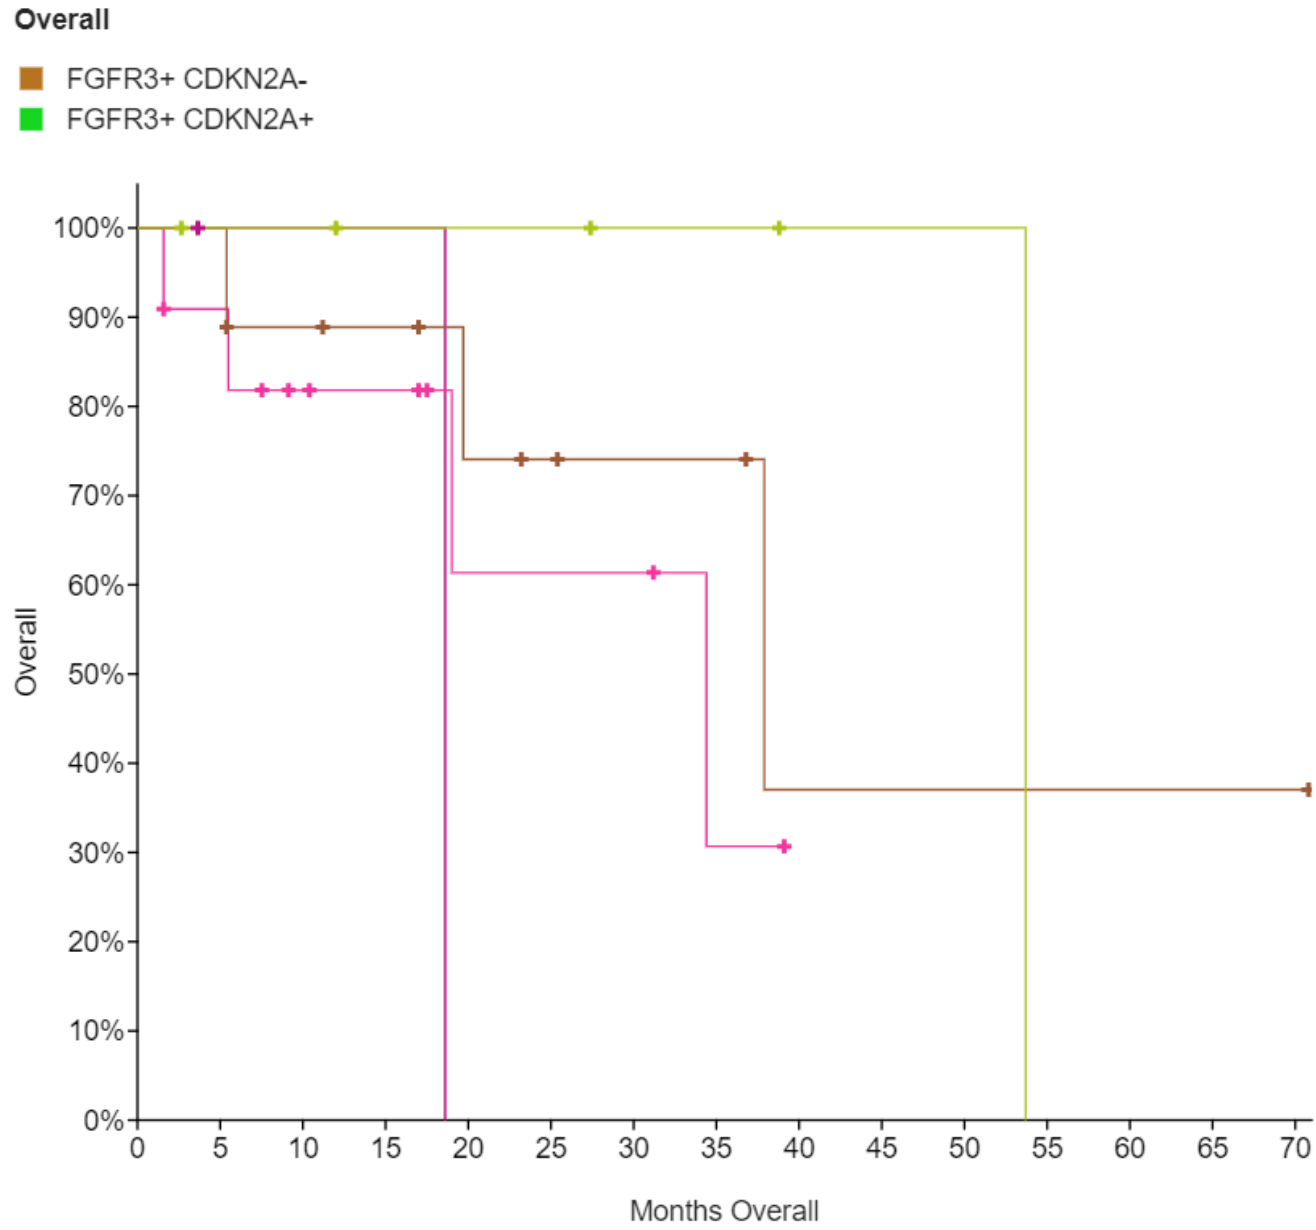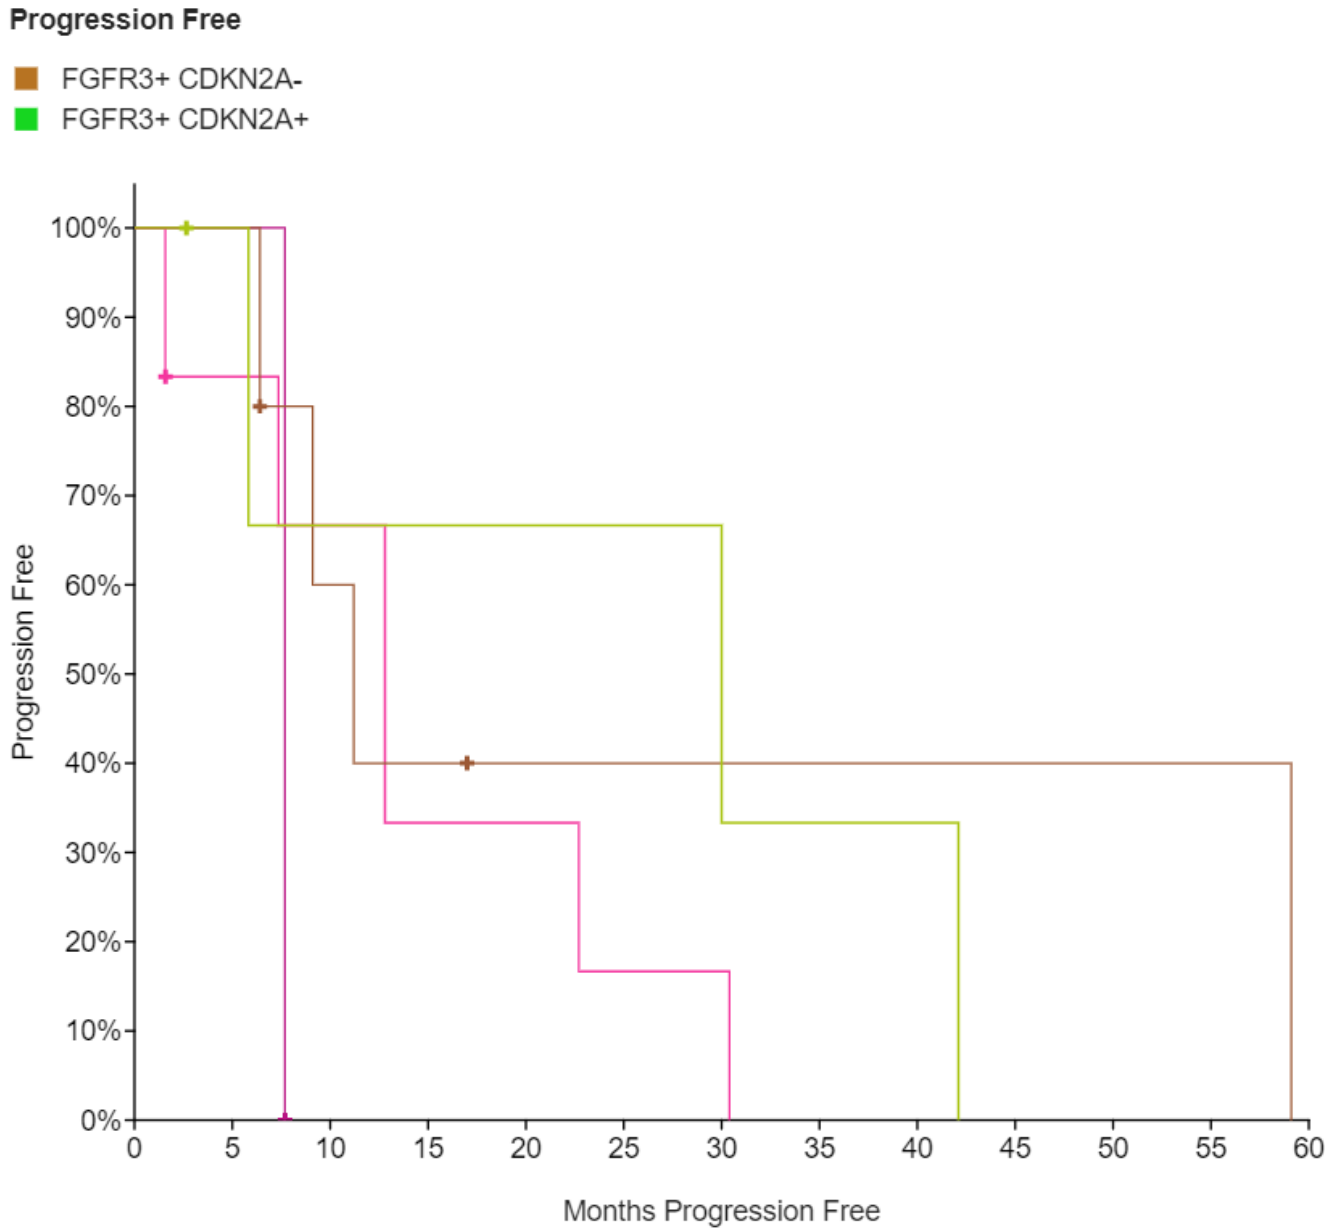

Supplementary Figure 2 – Other p16-RB1 pathway alterations

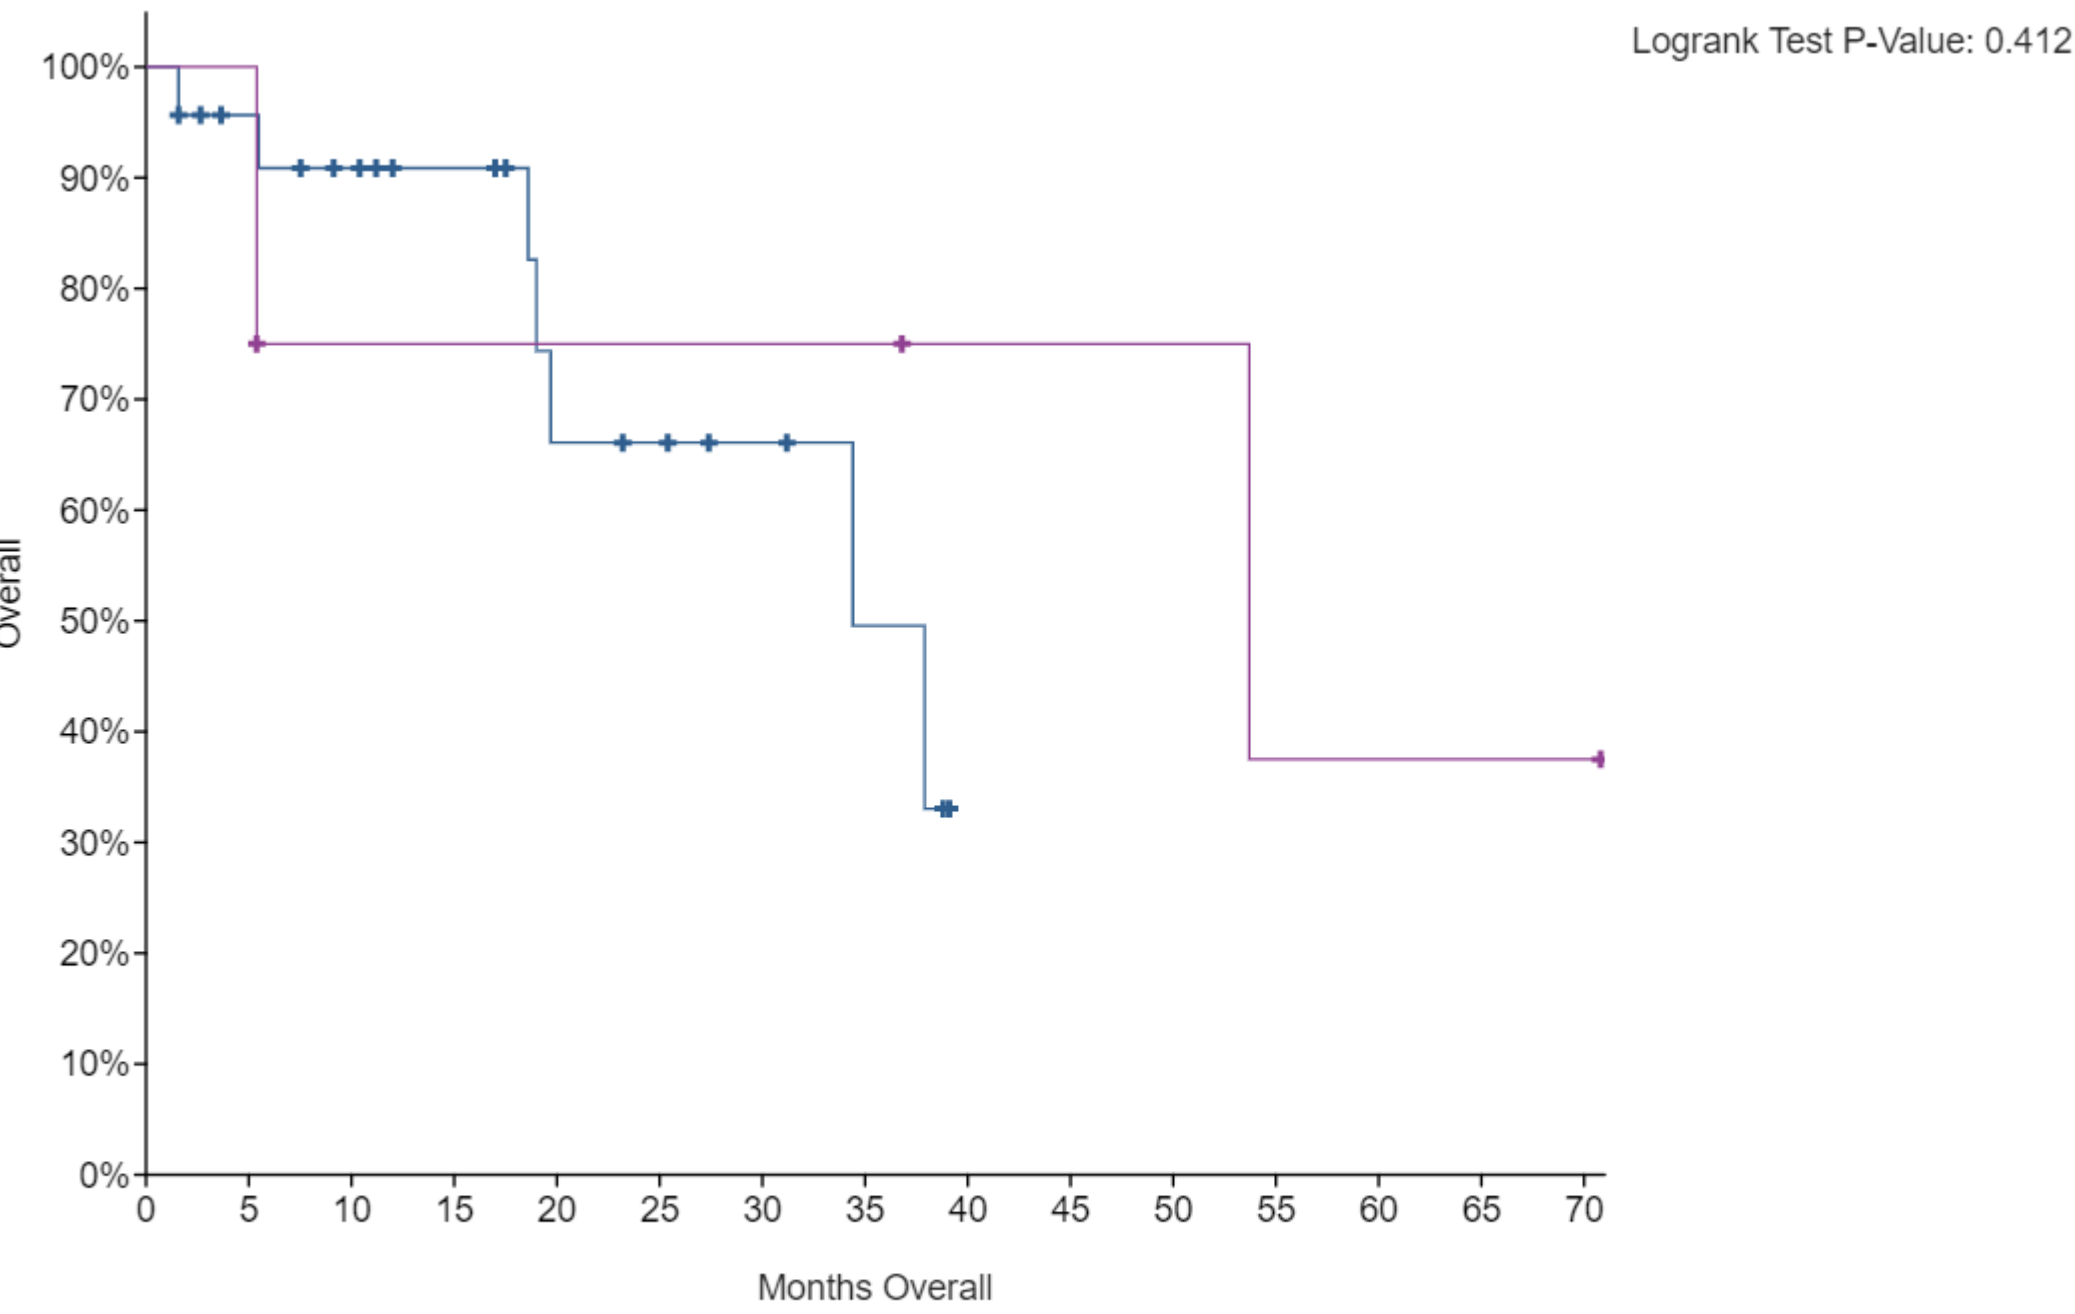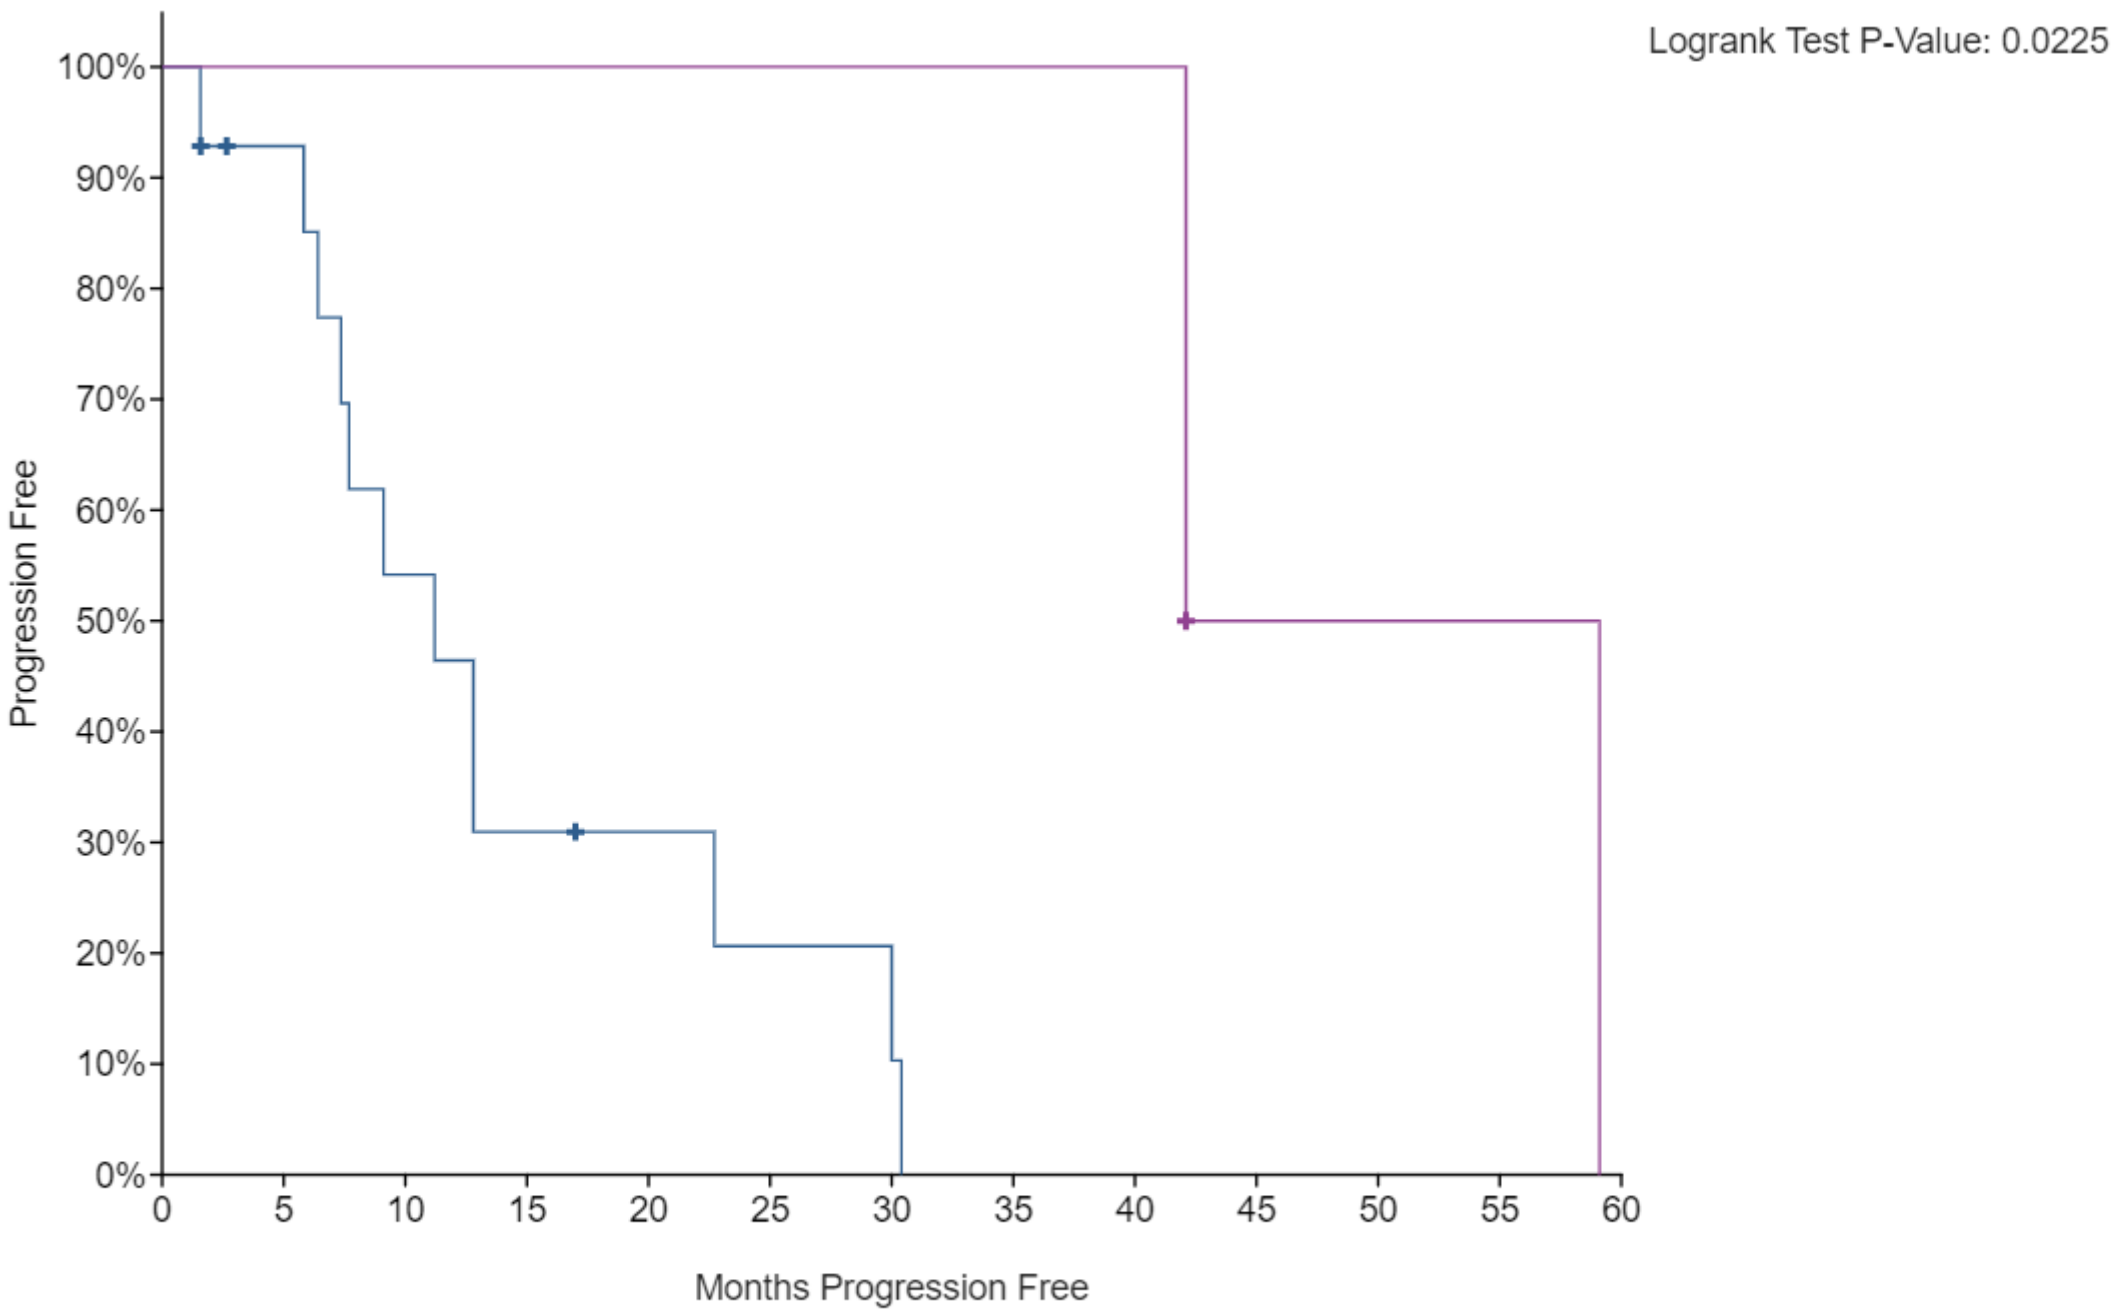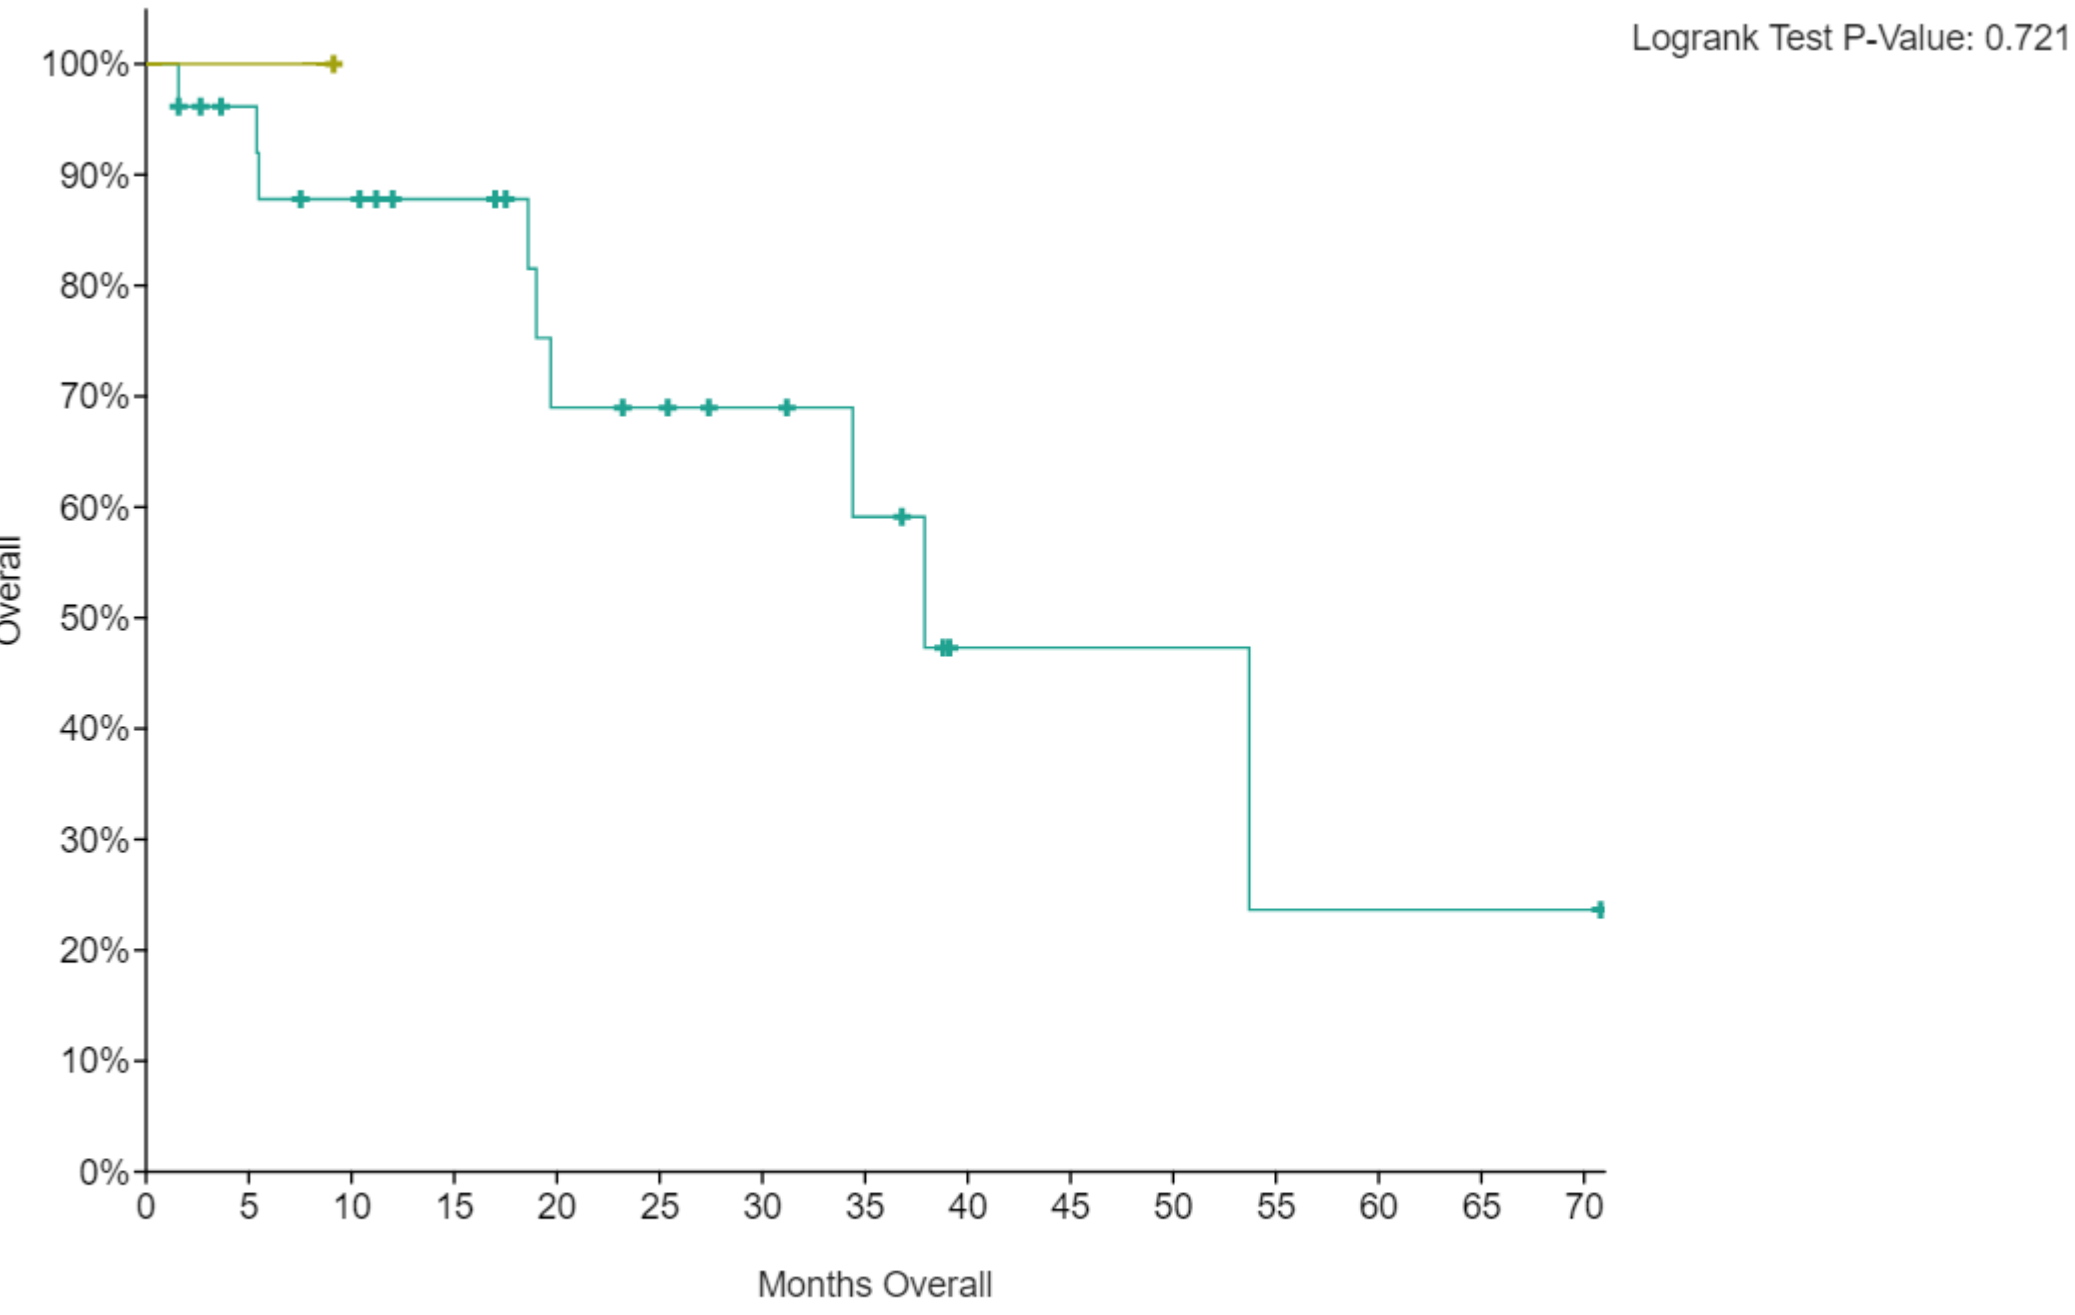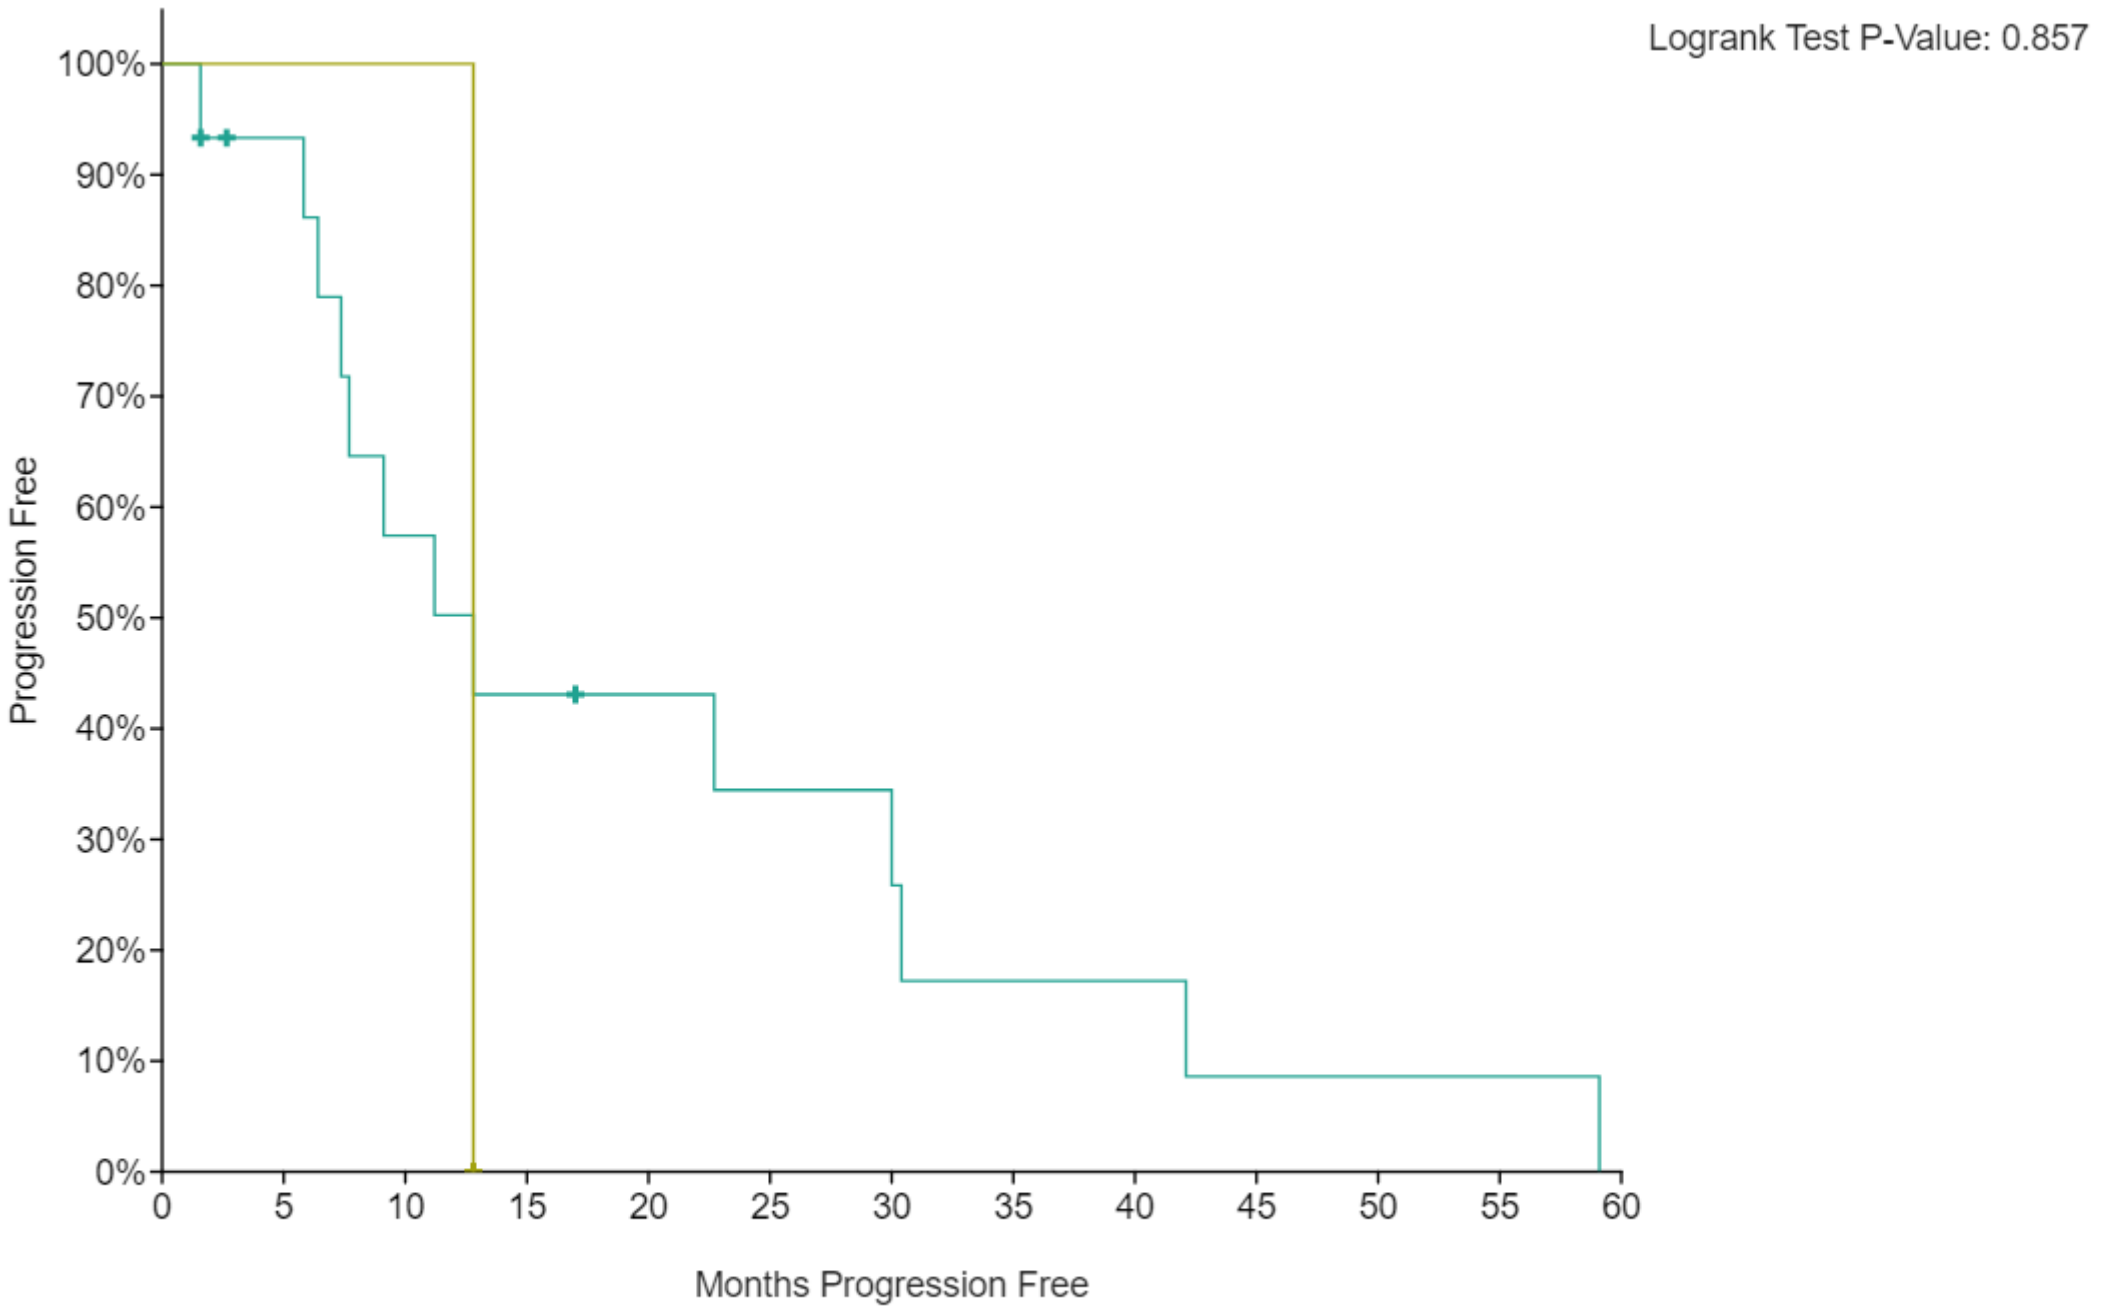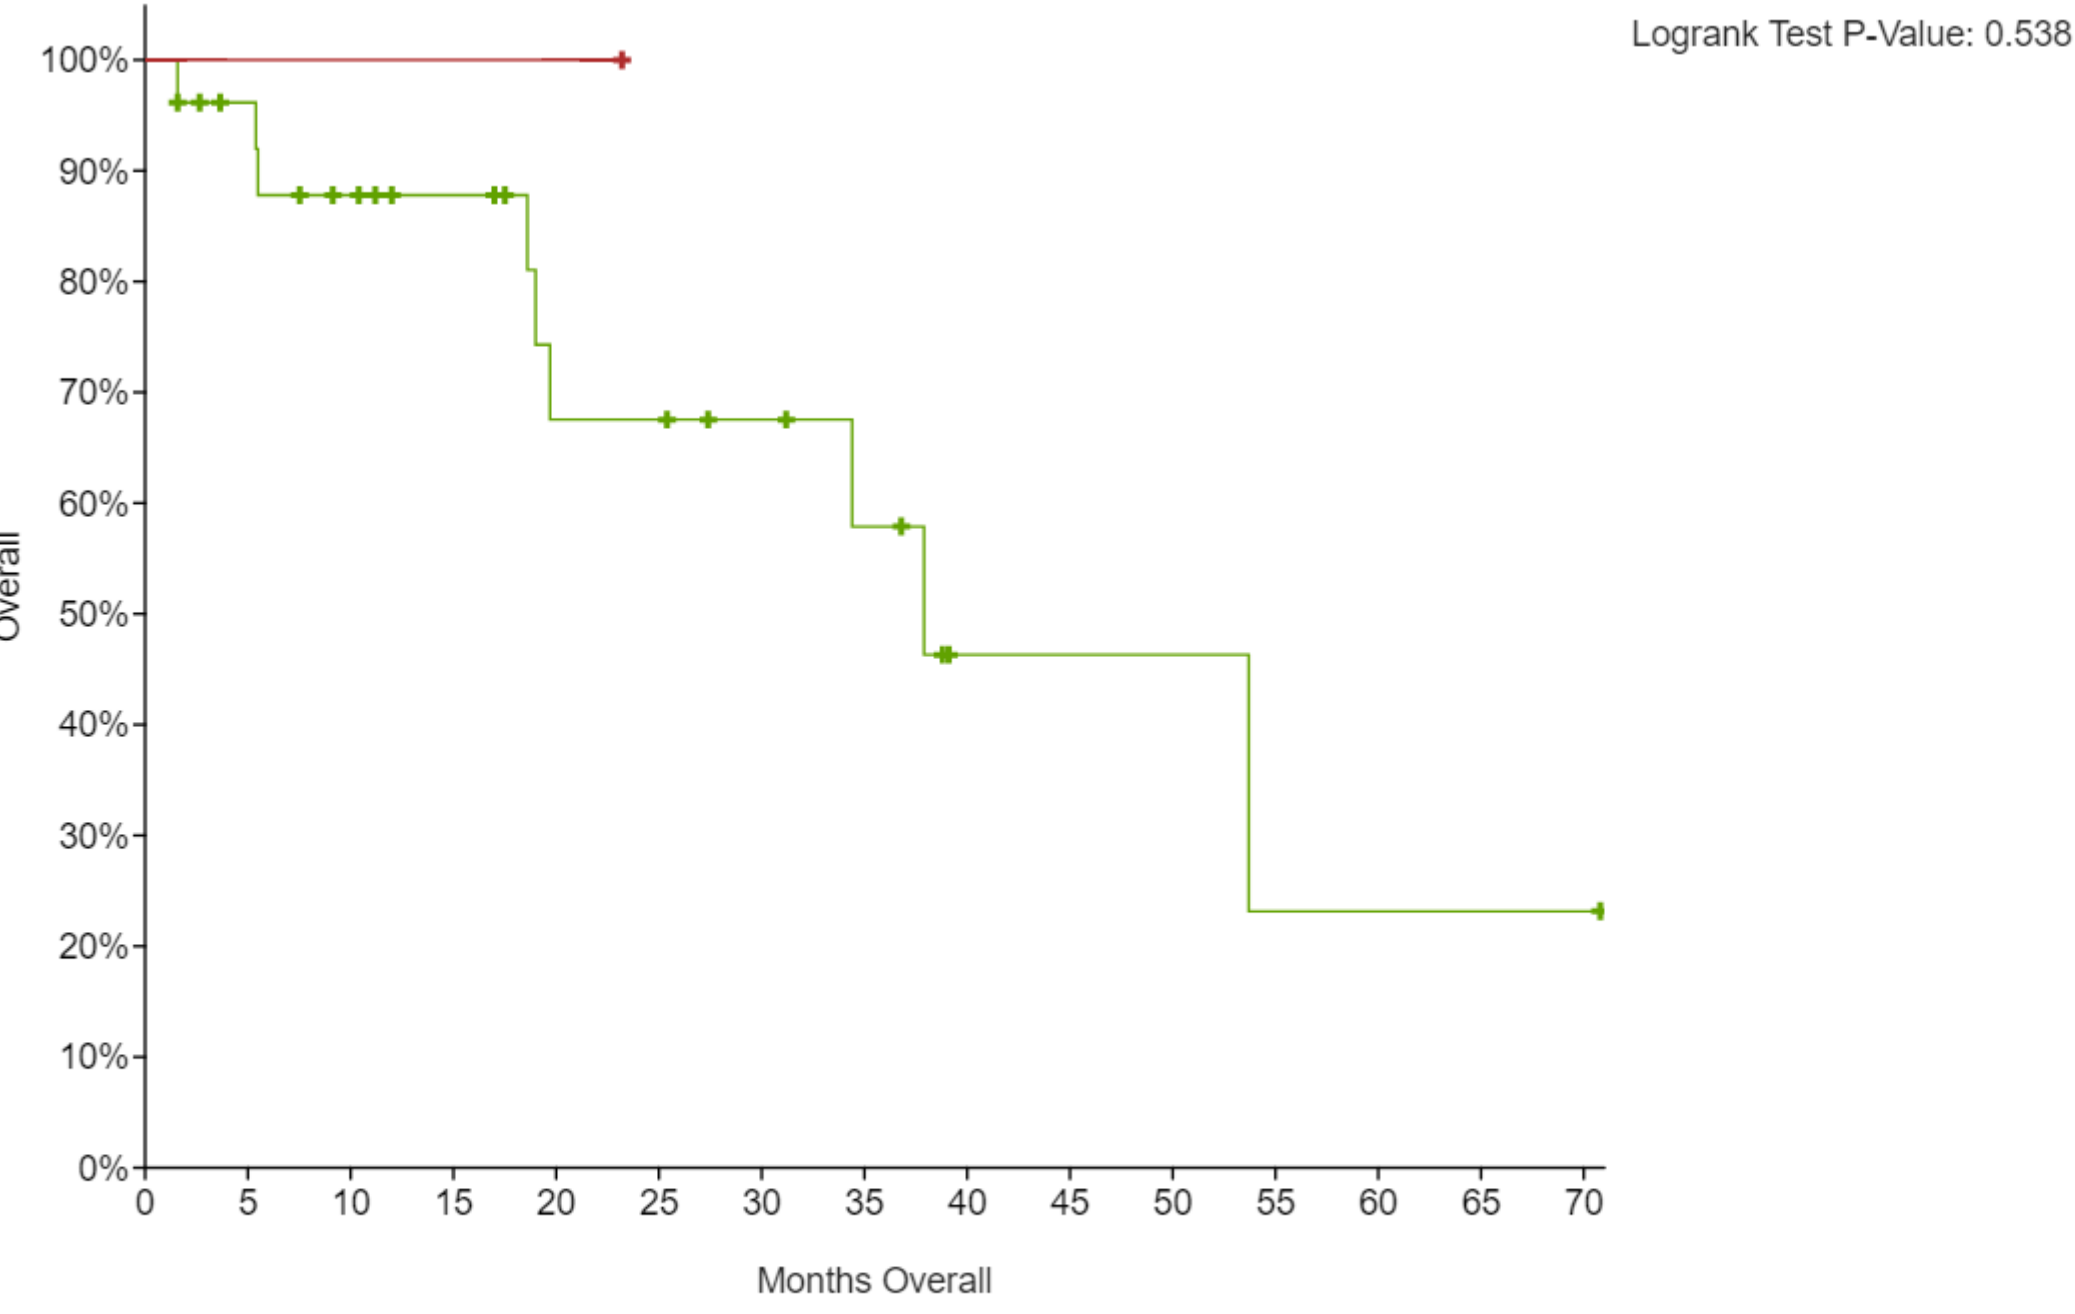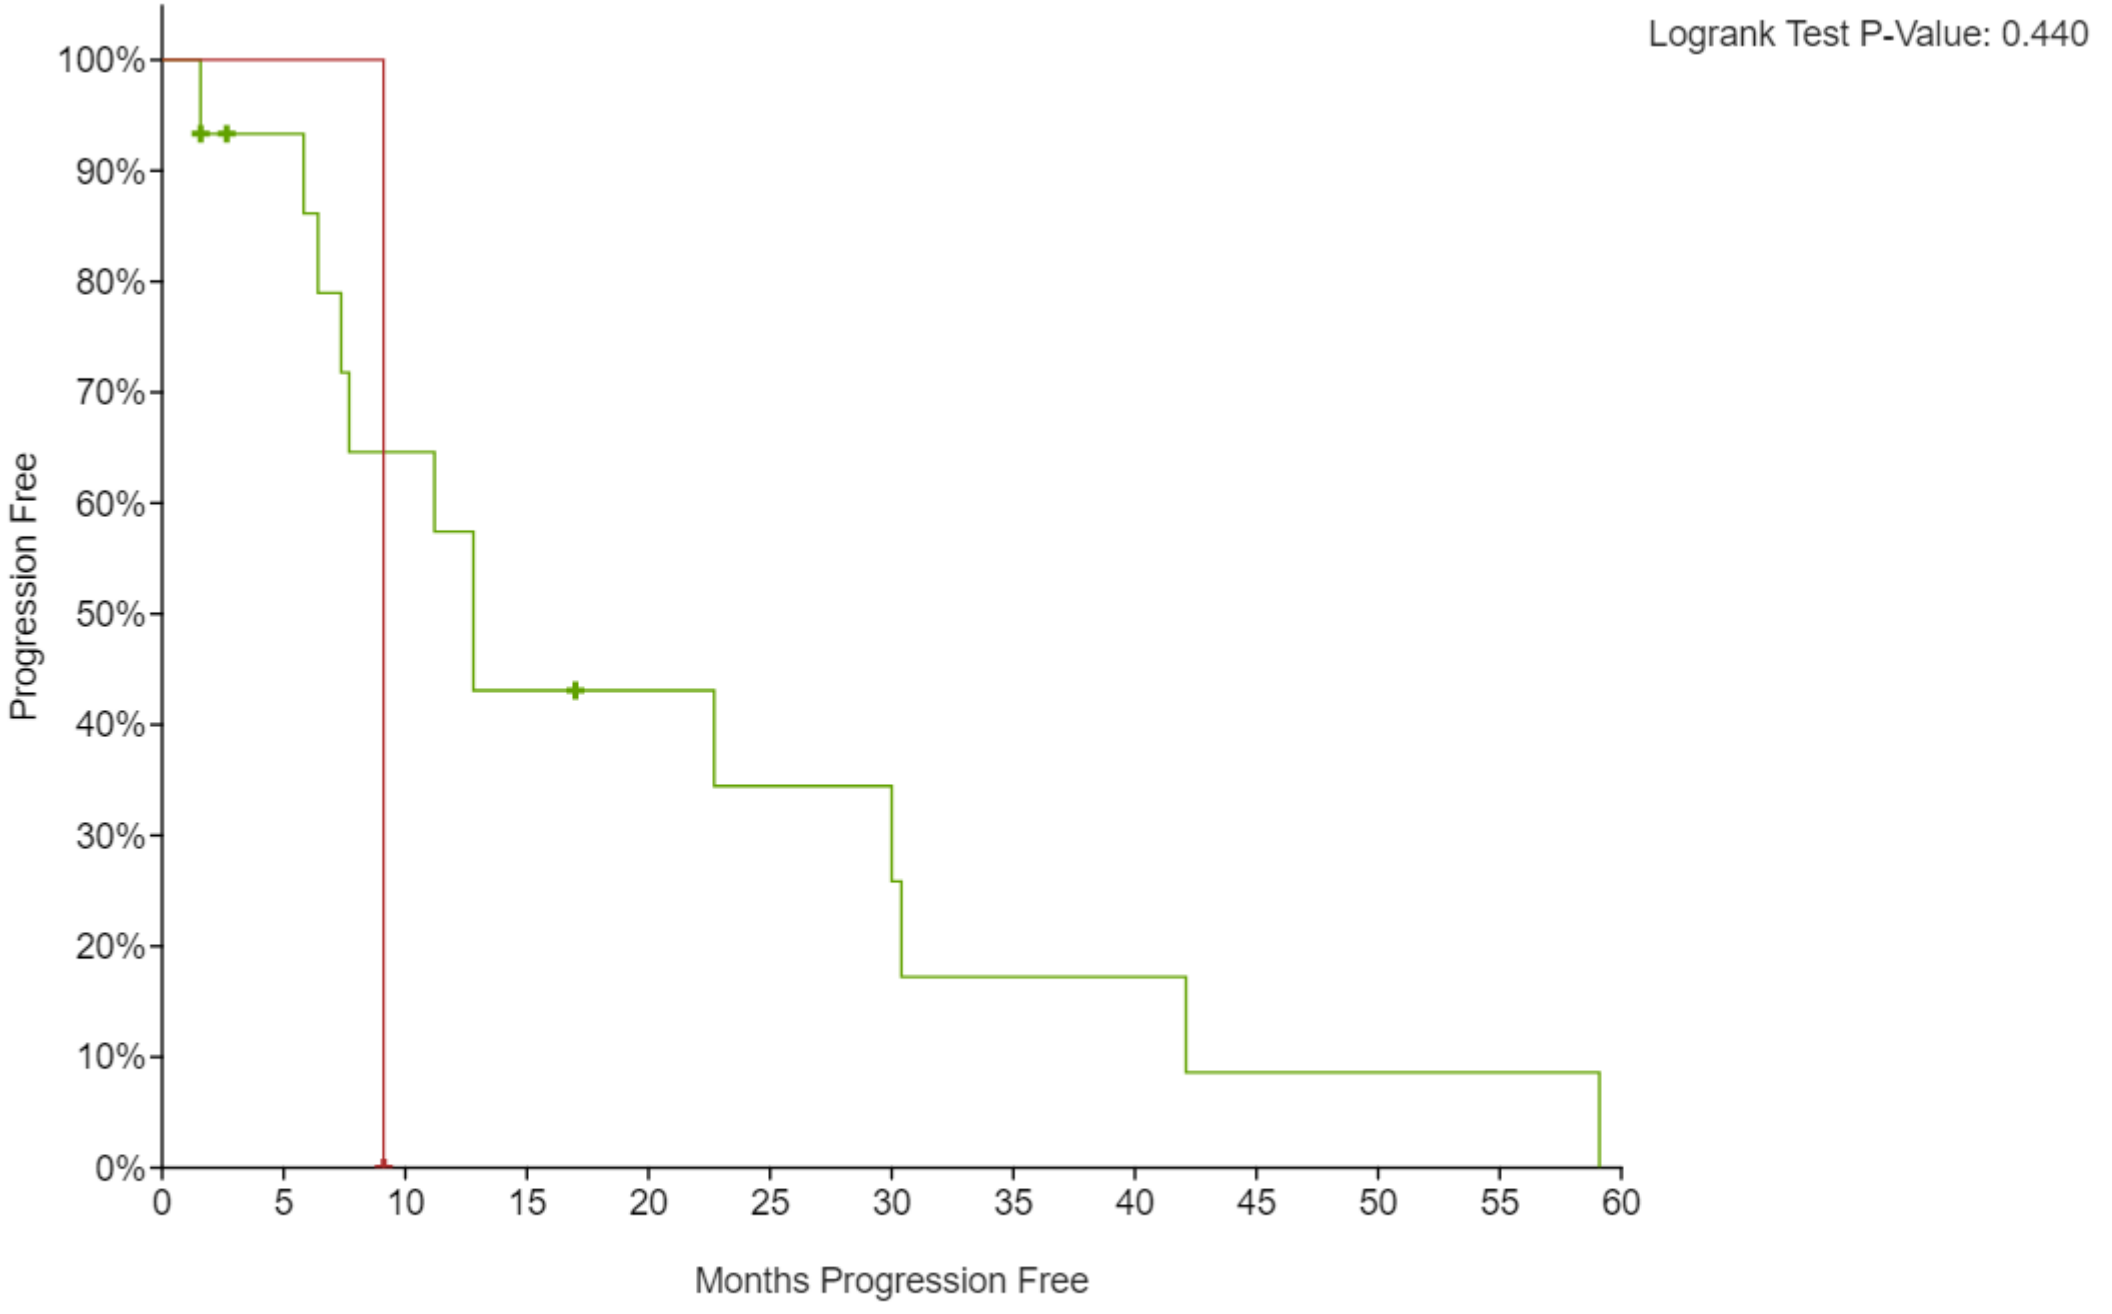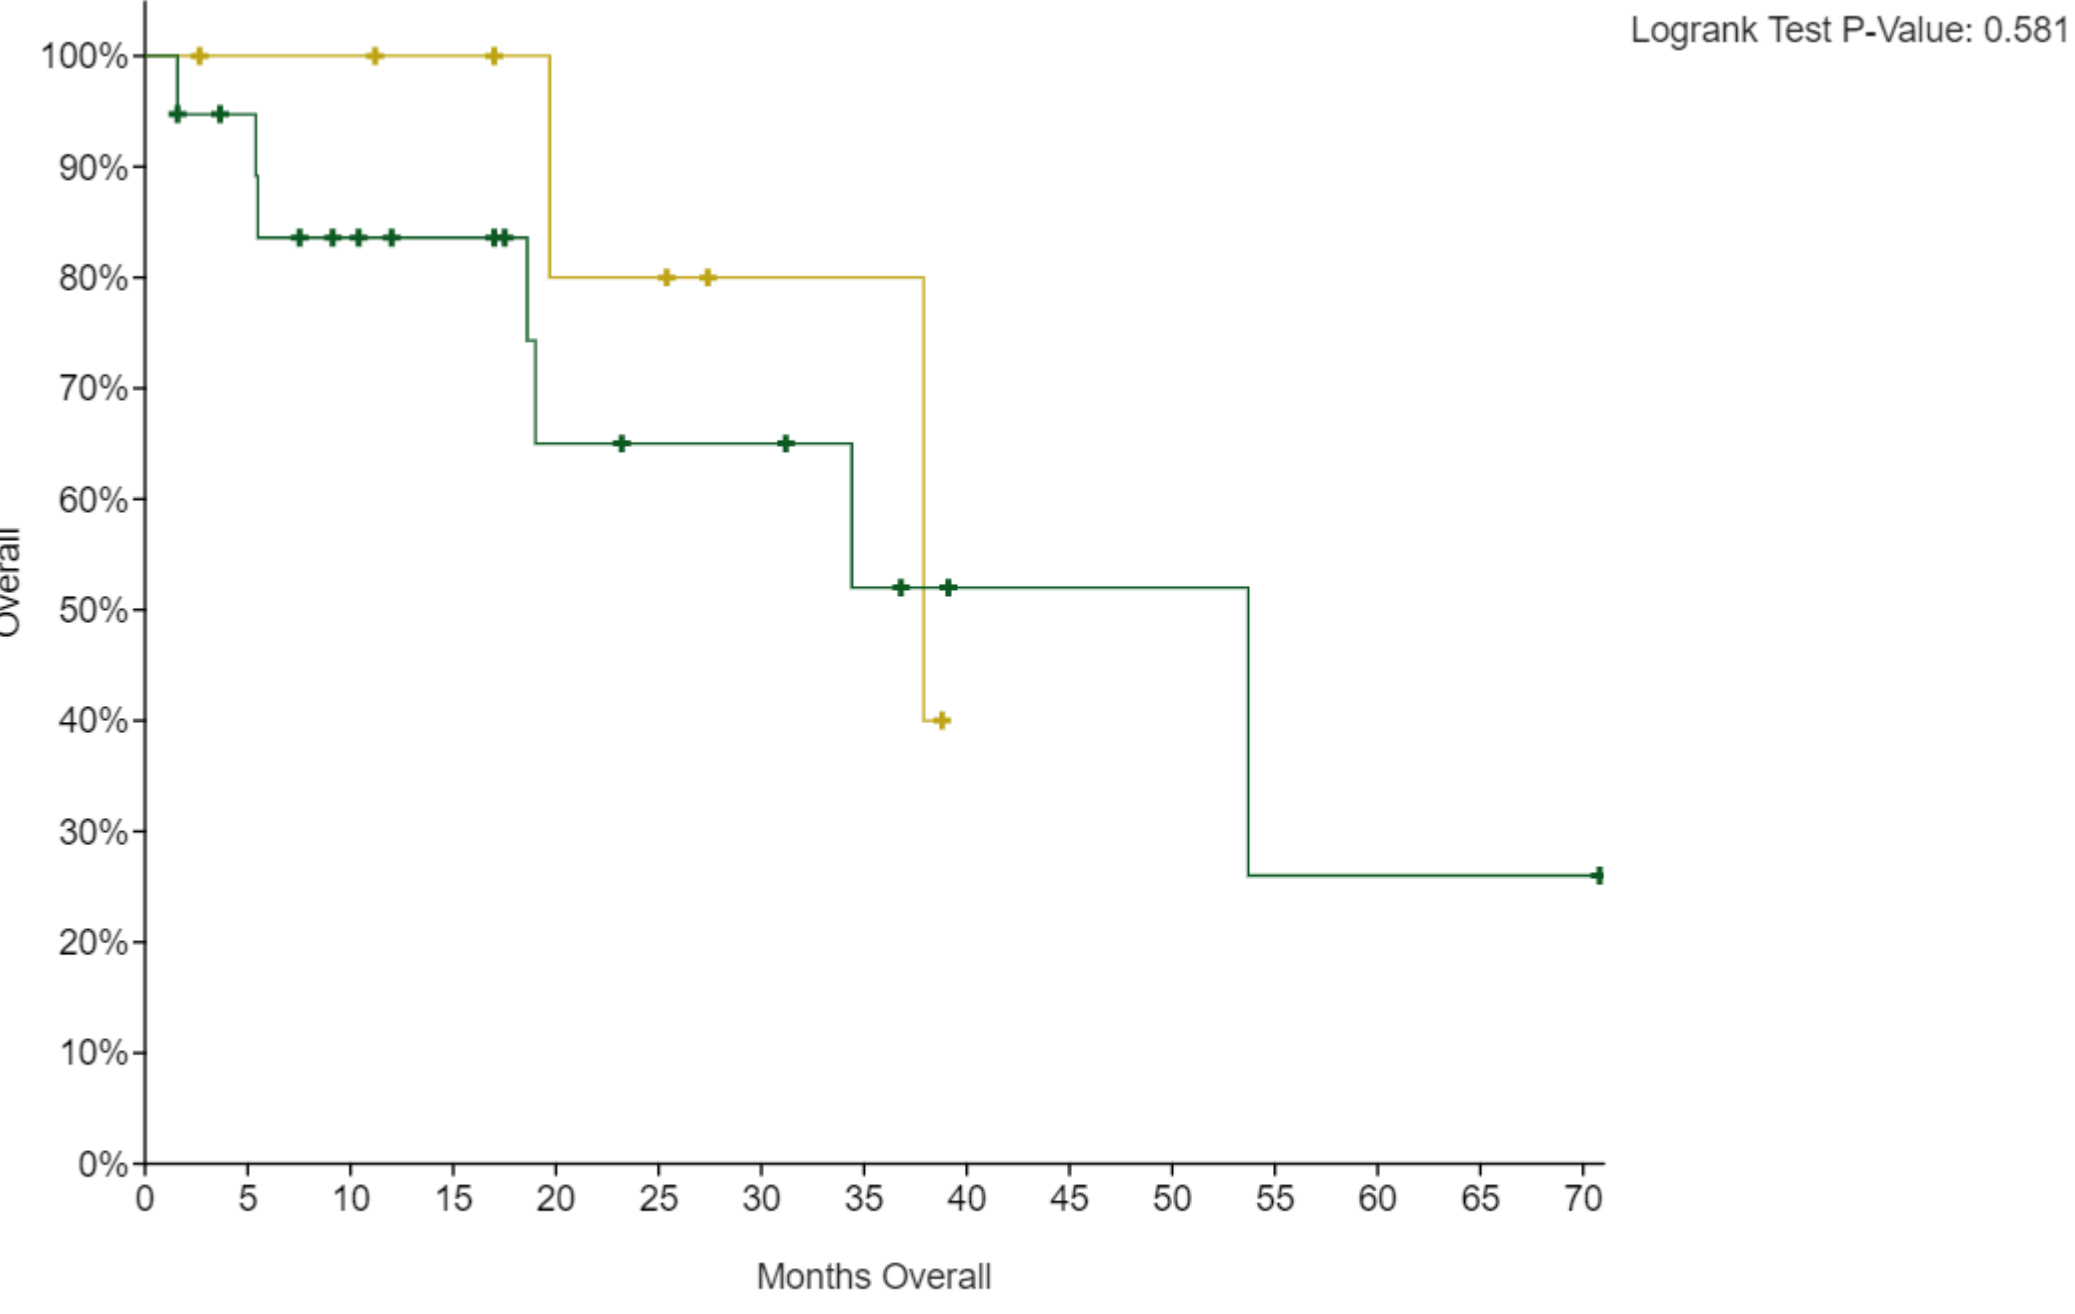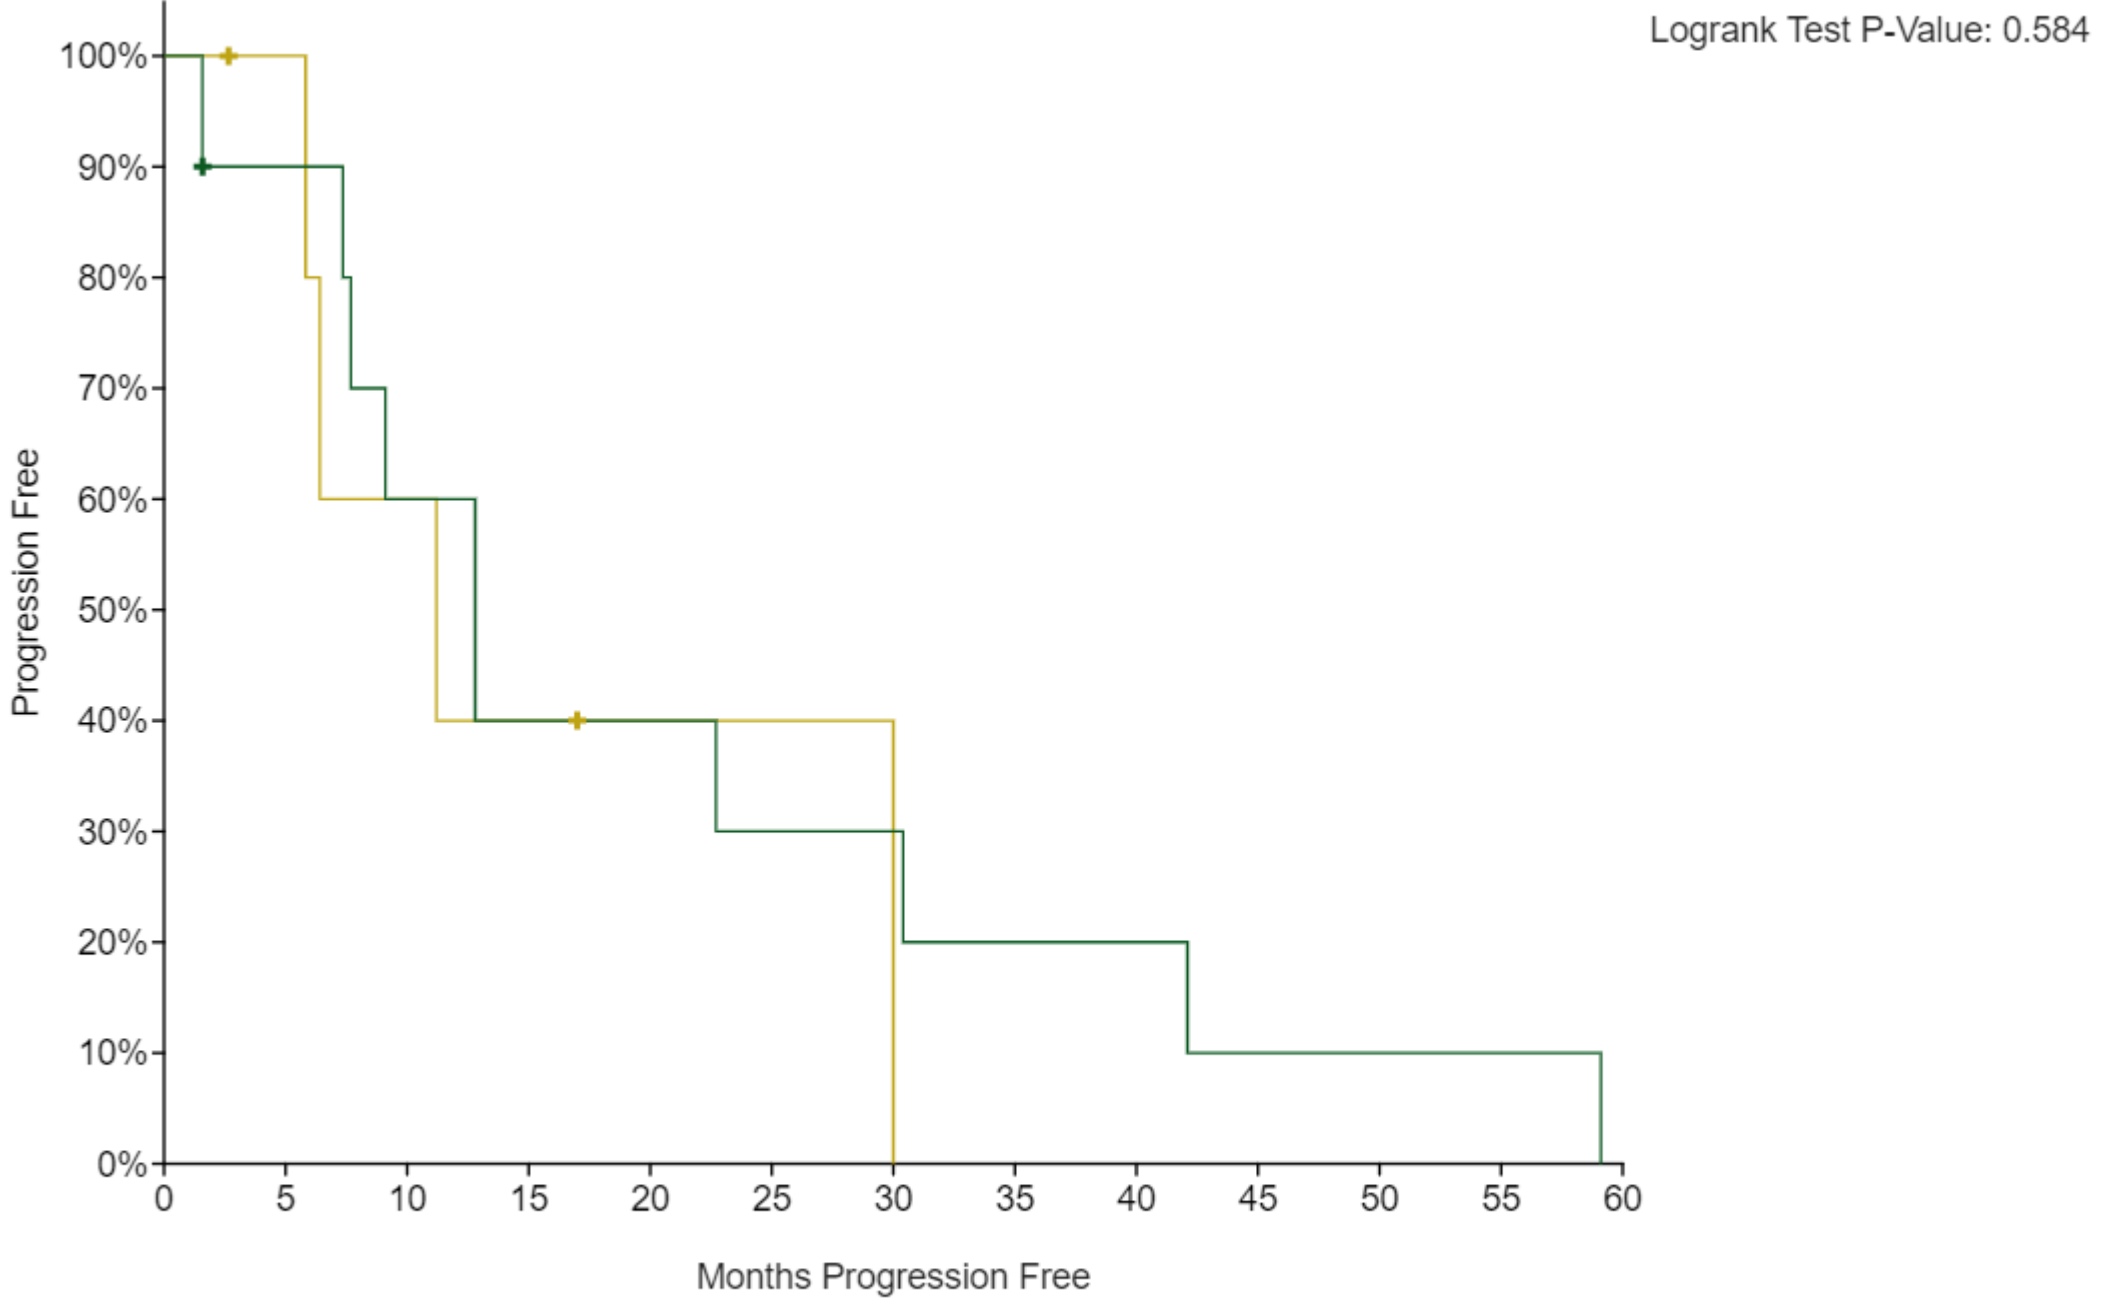

Supplementary Figure 3 – Other p14-p53 pathway alterations

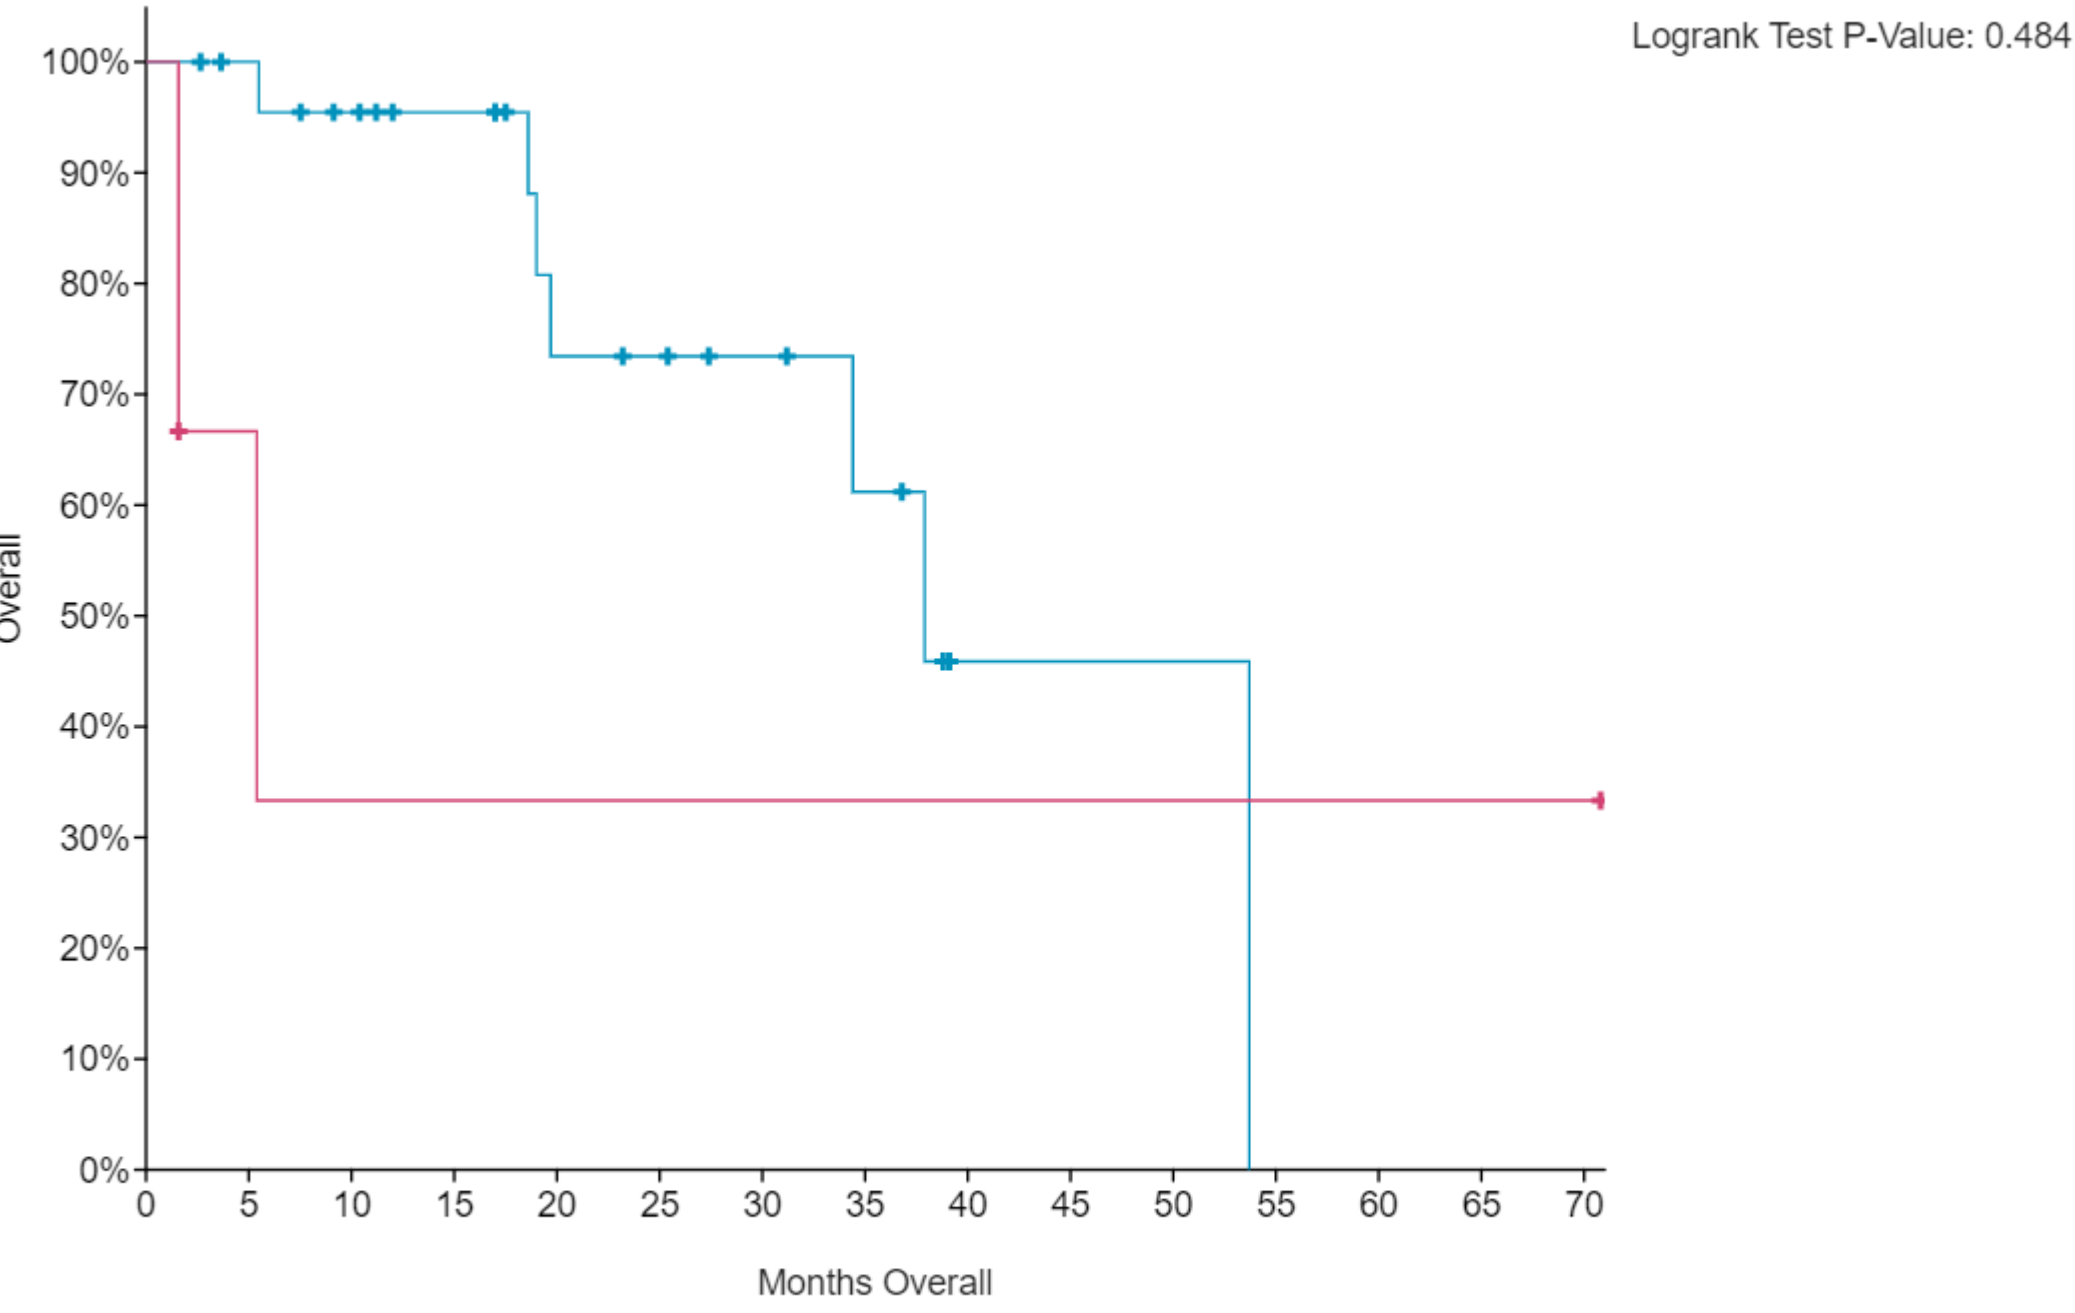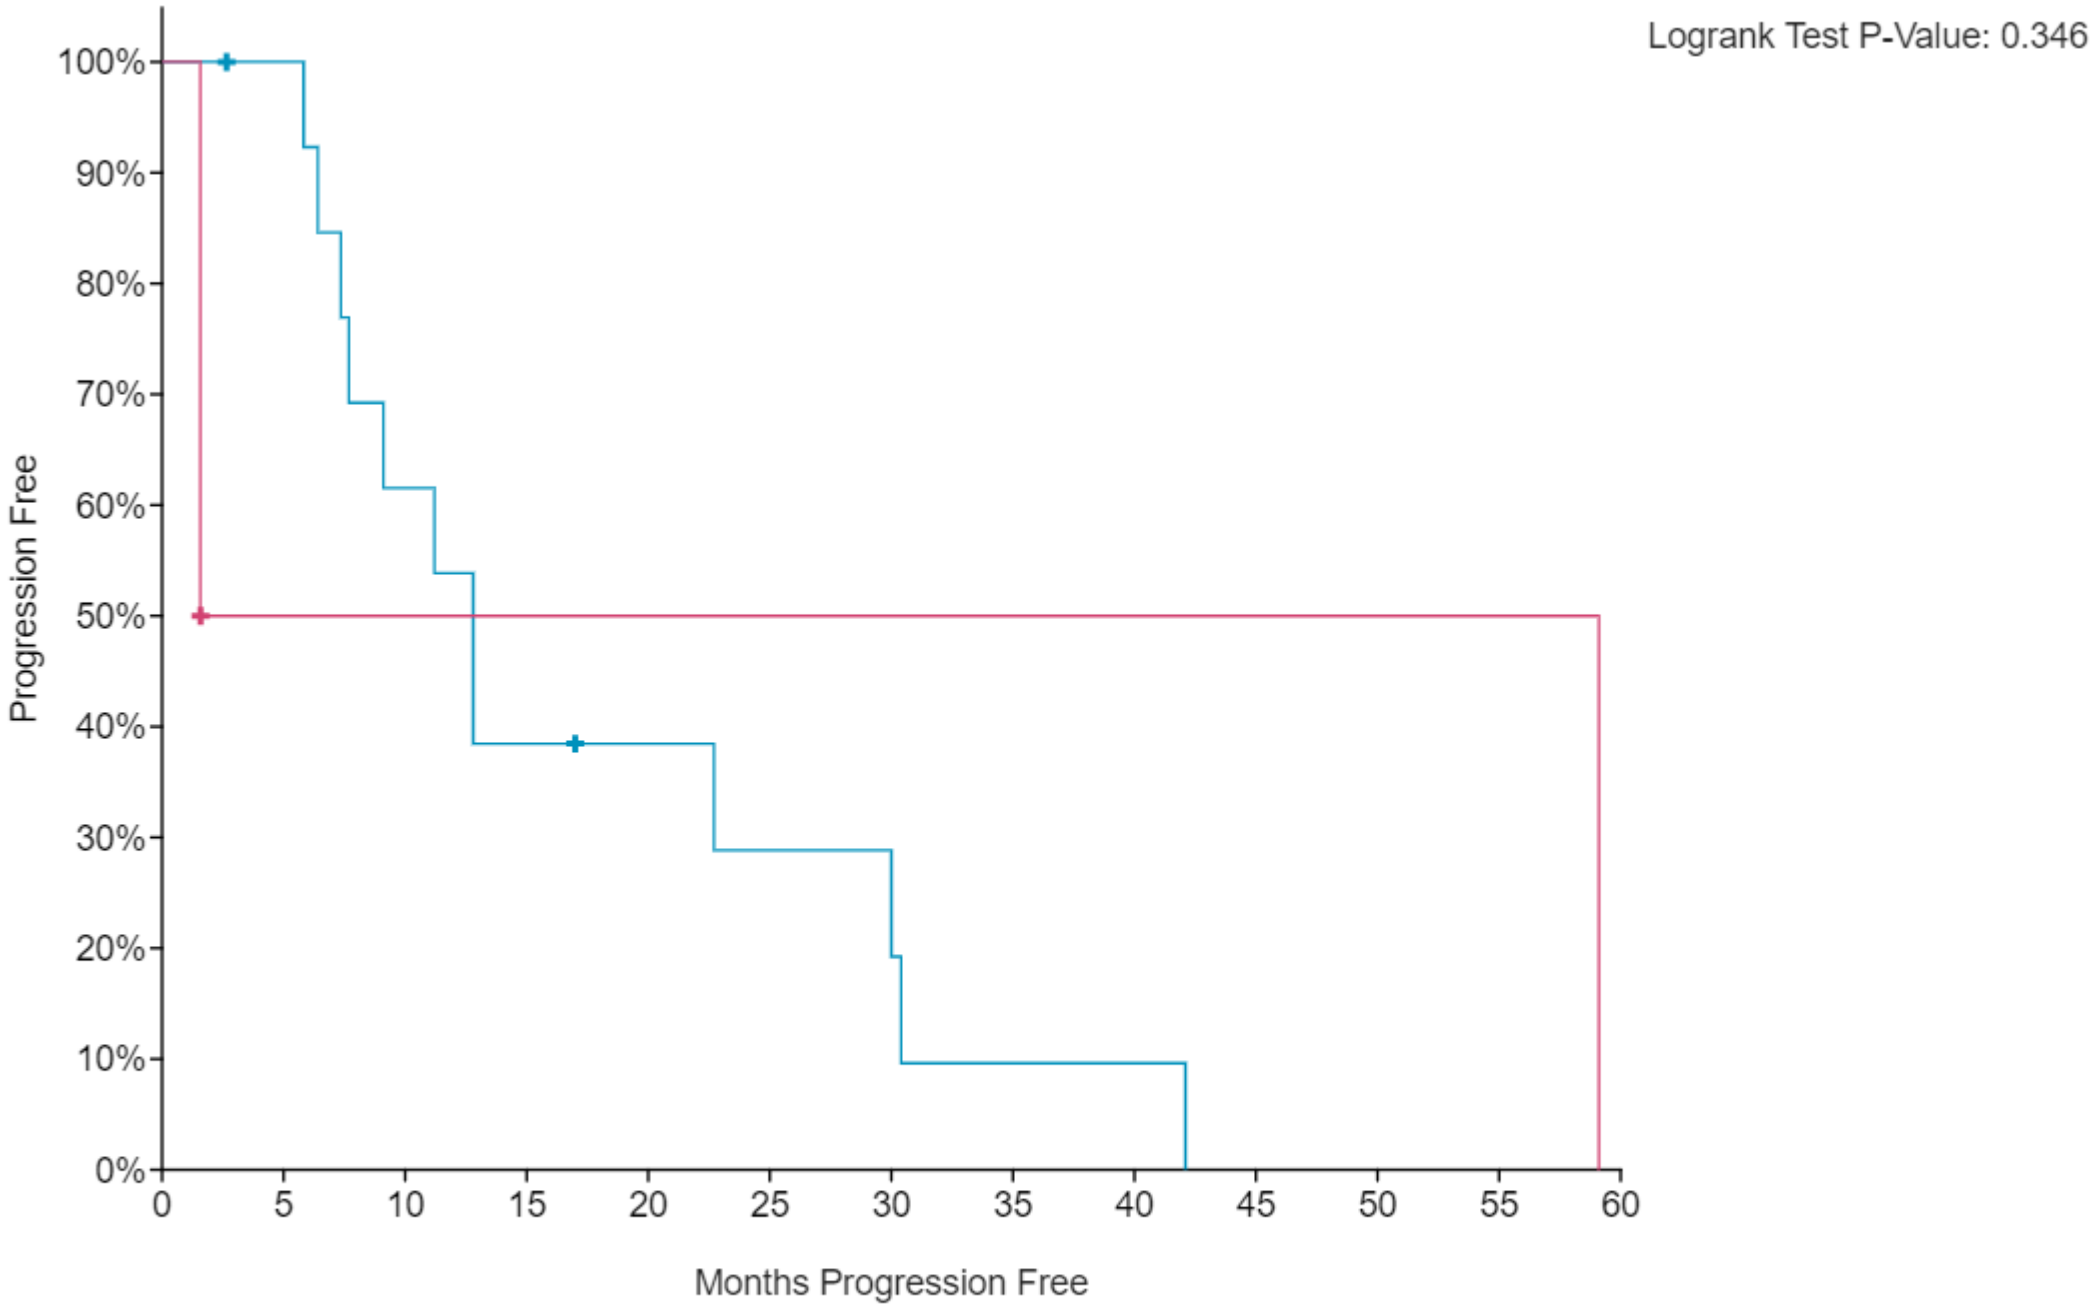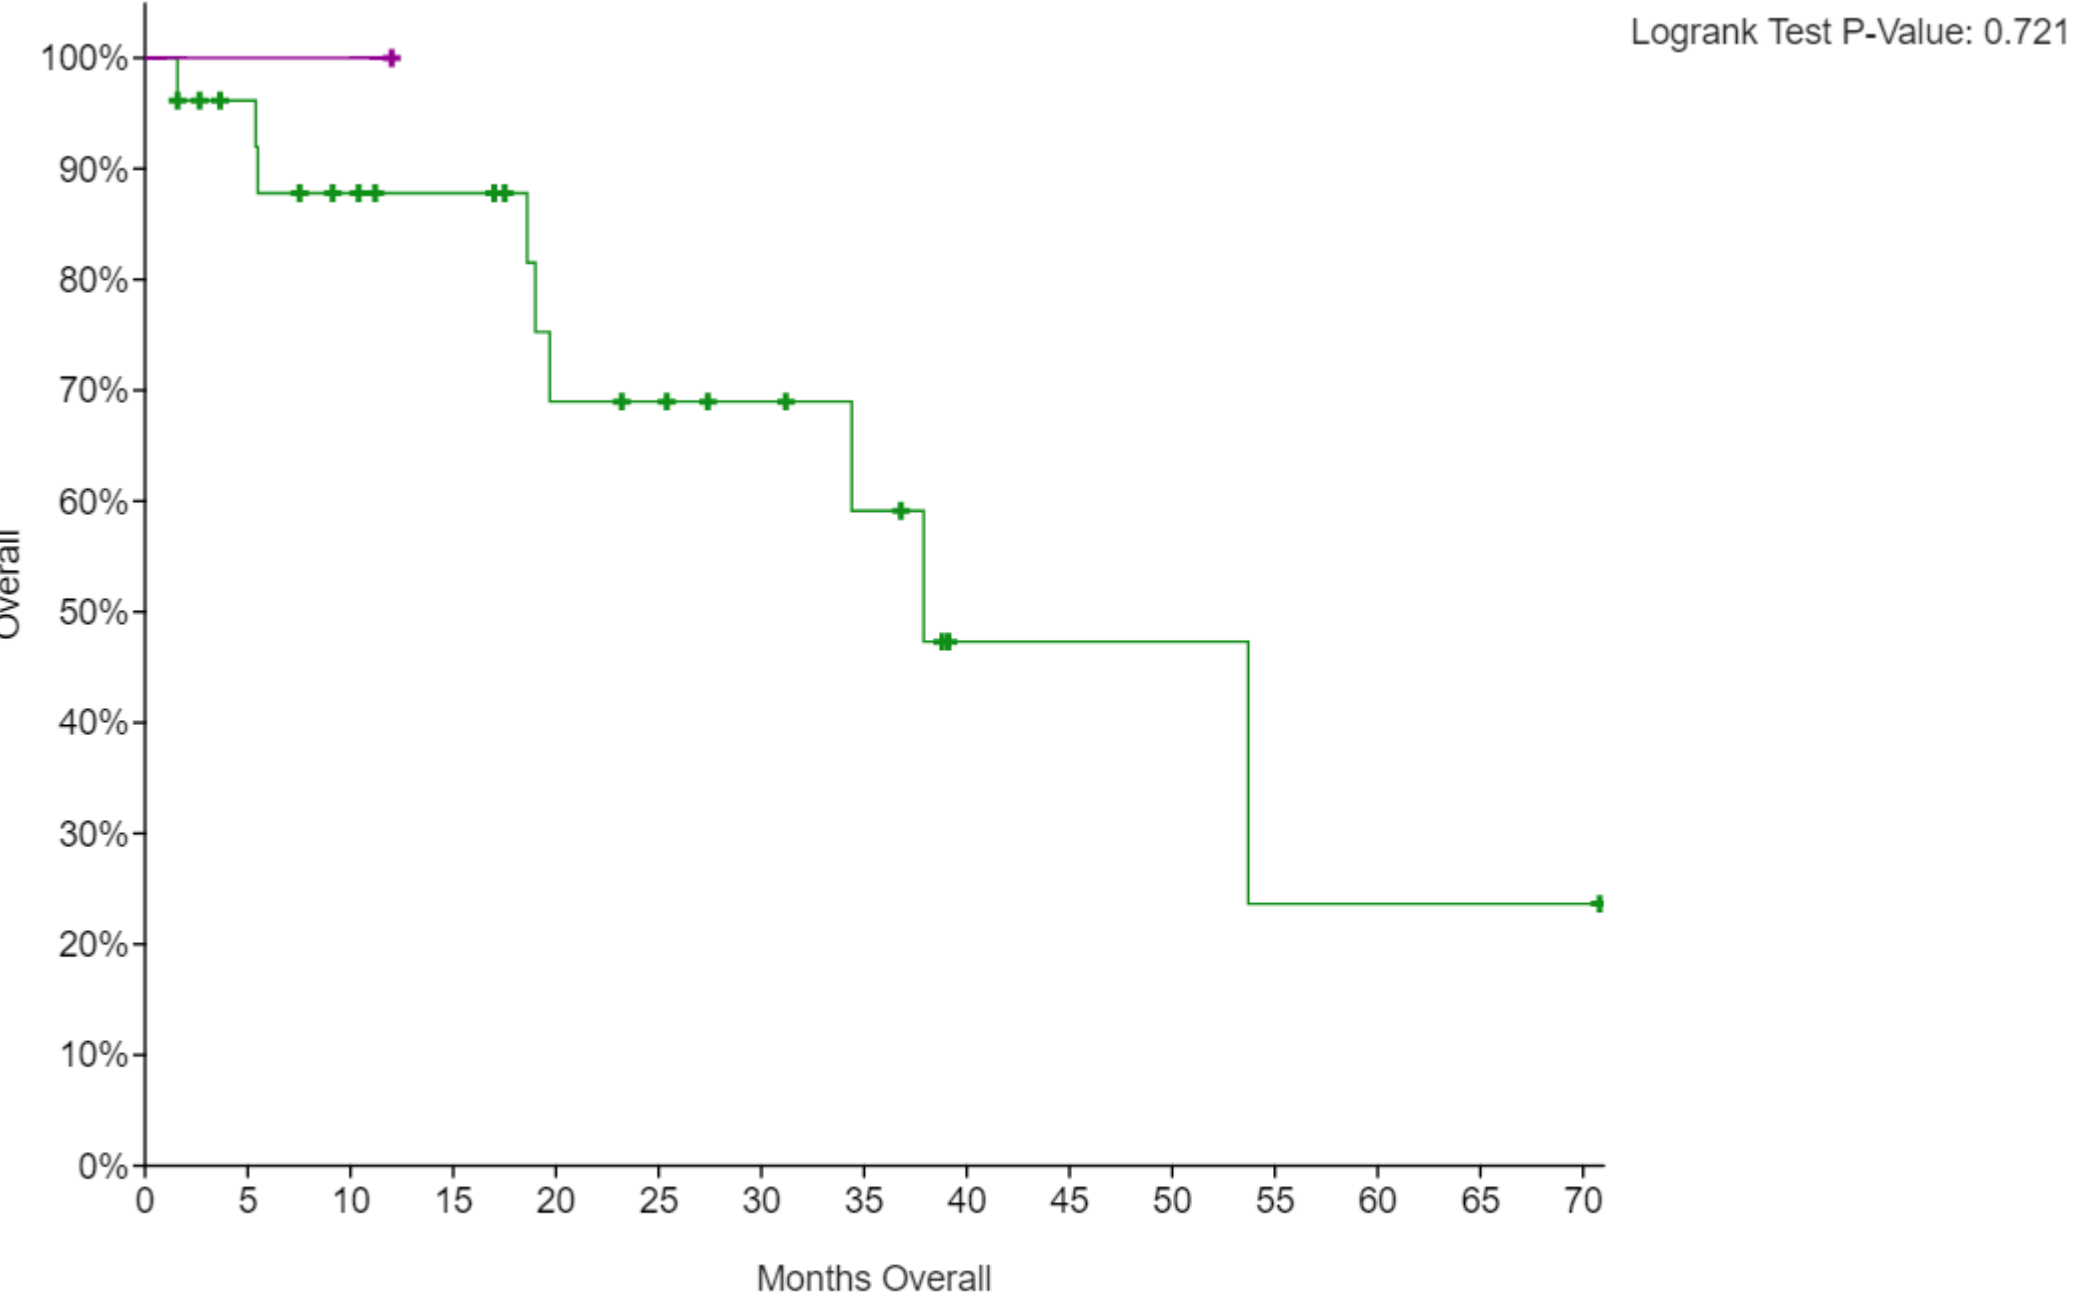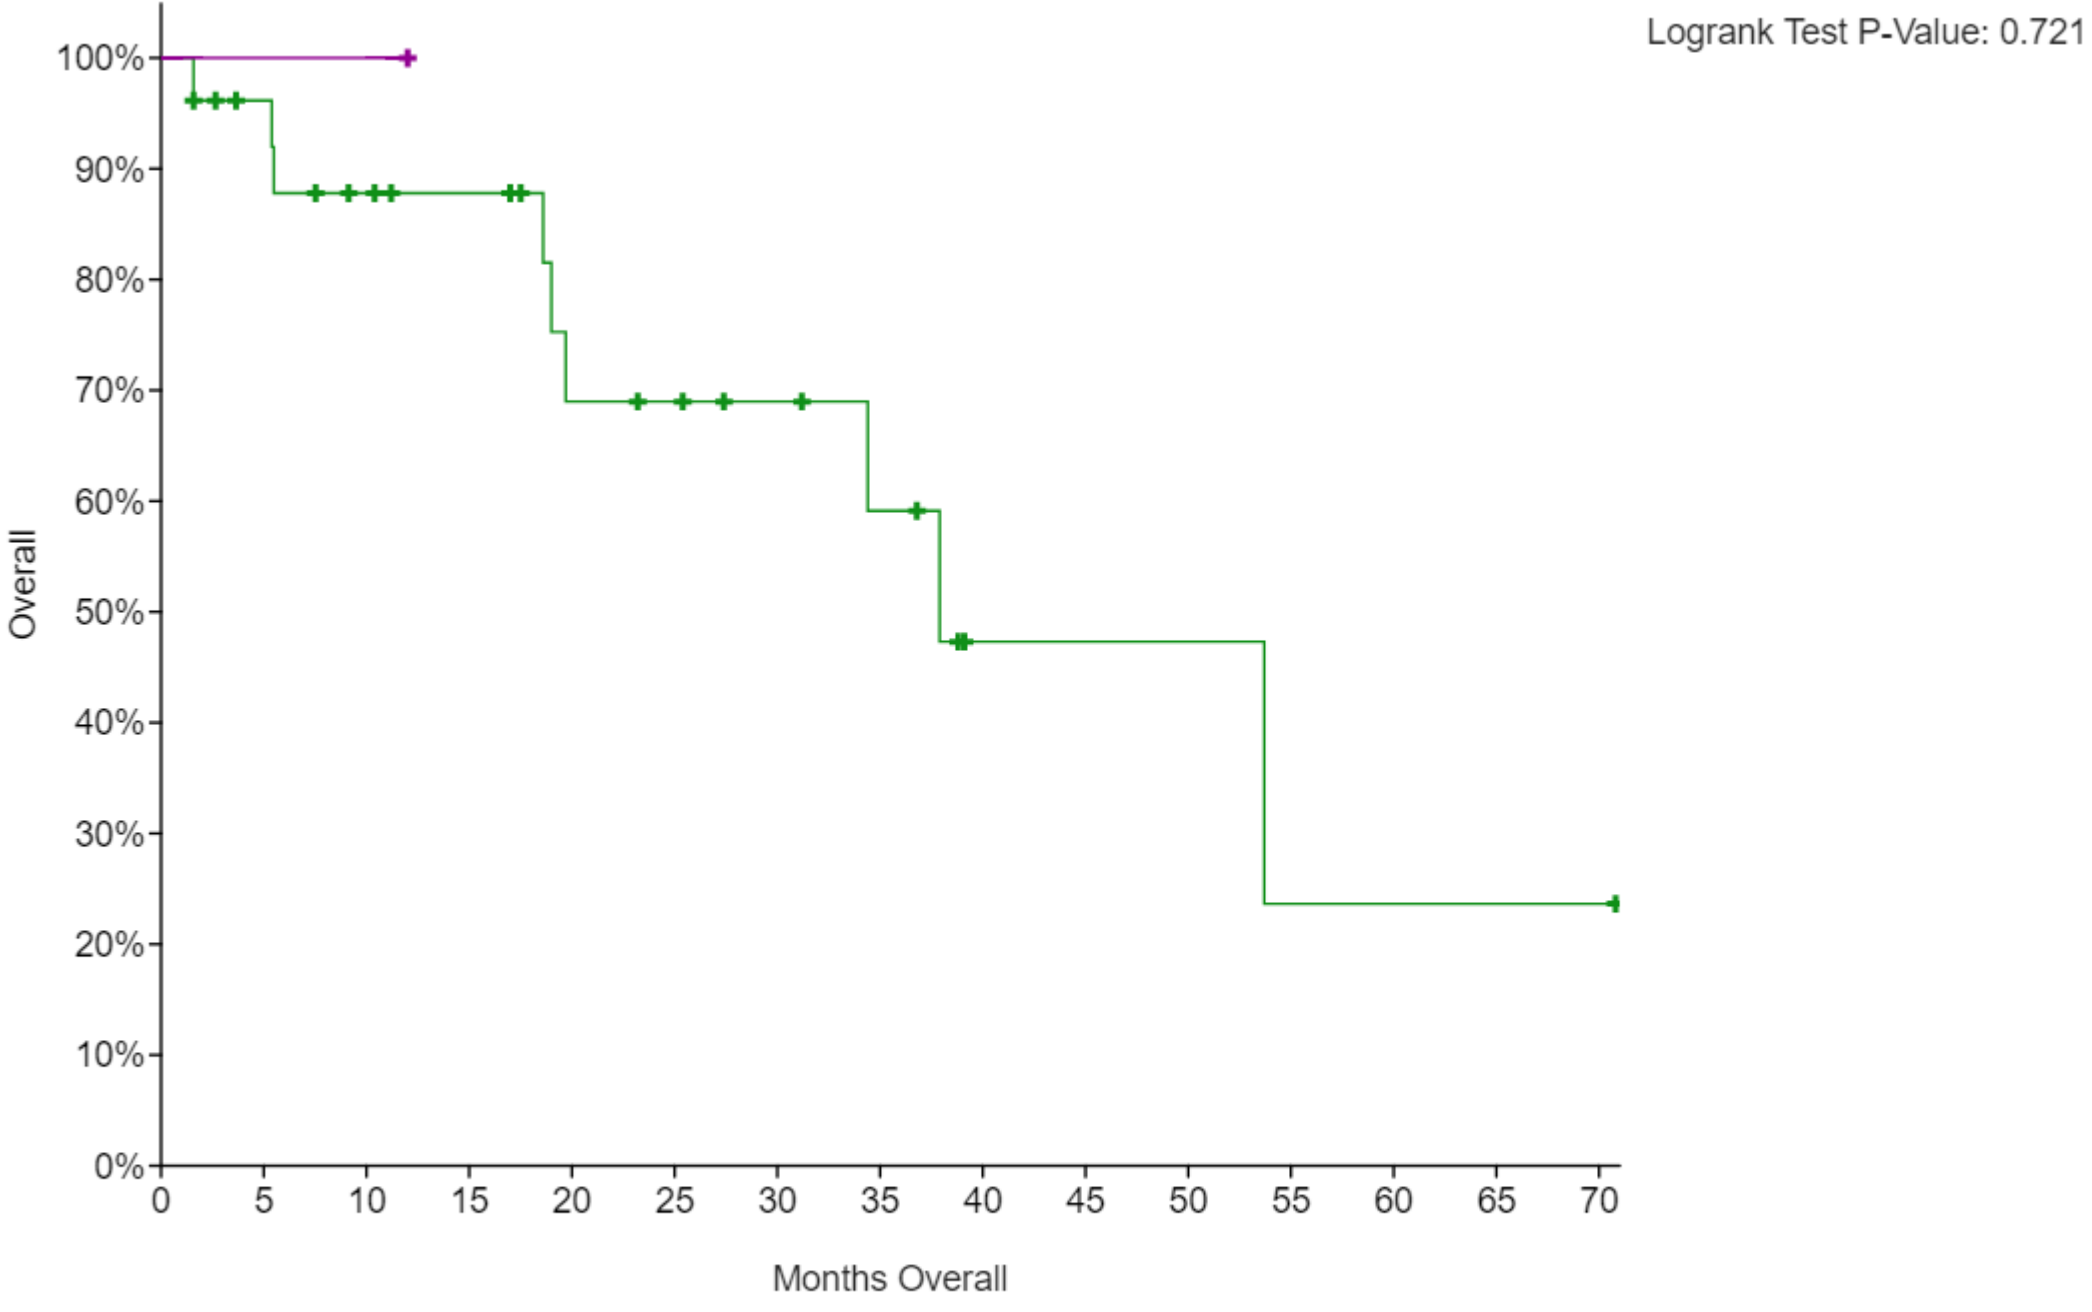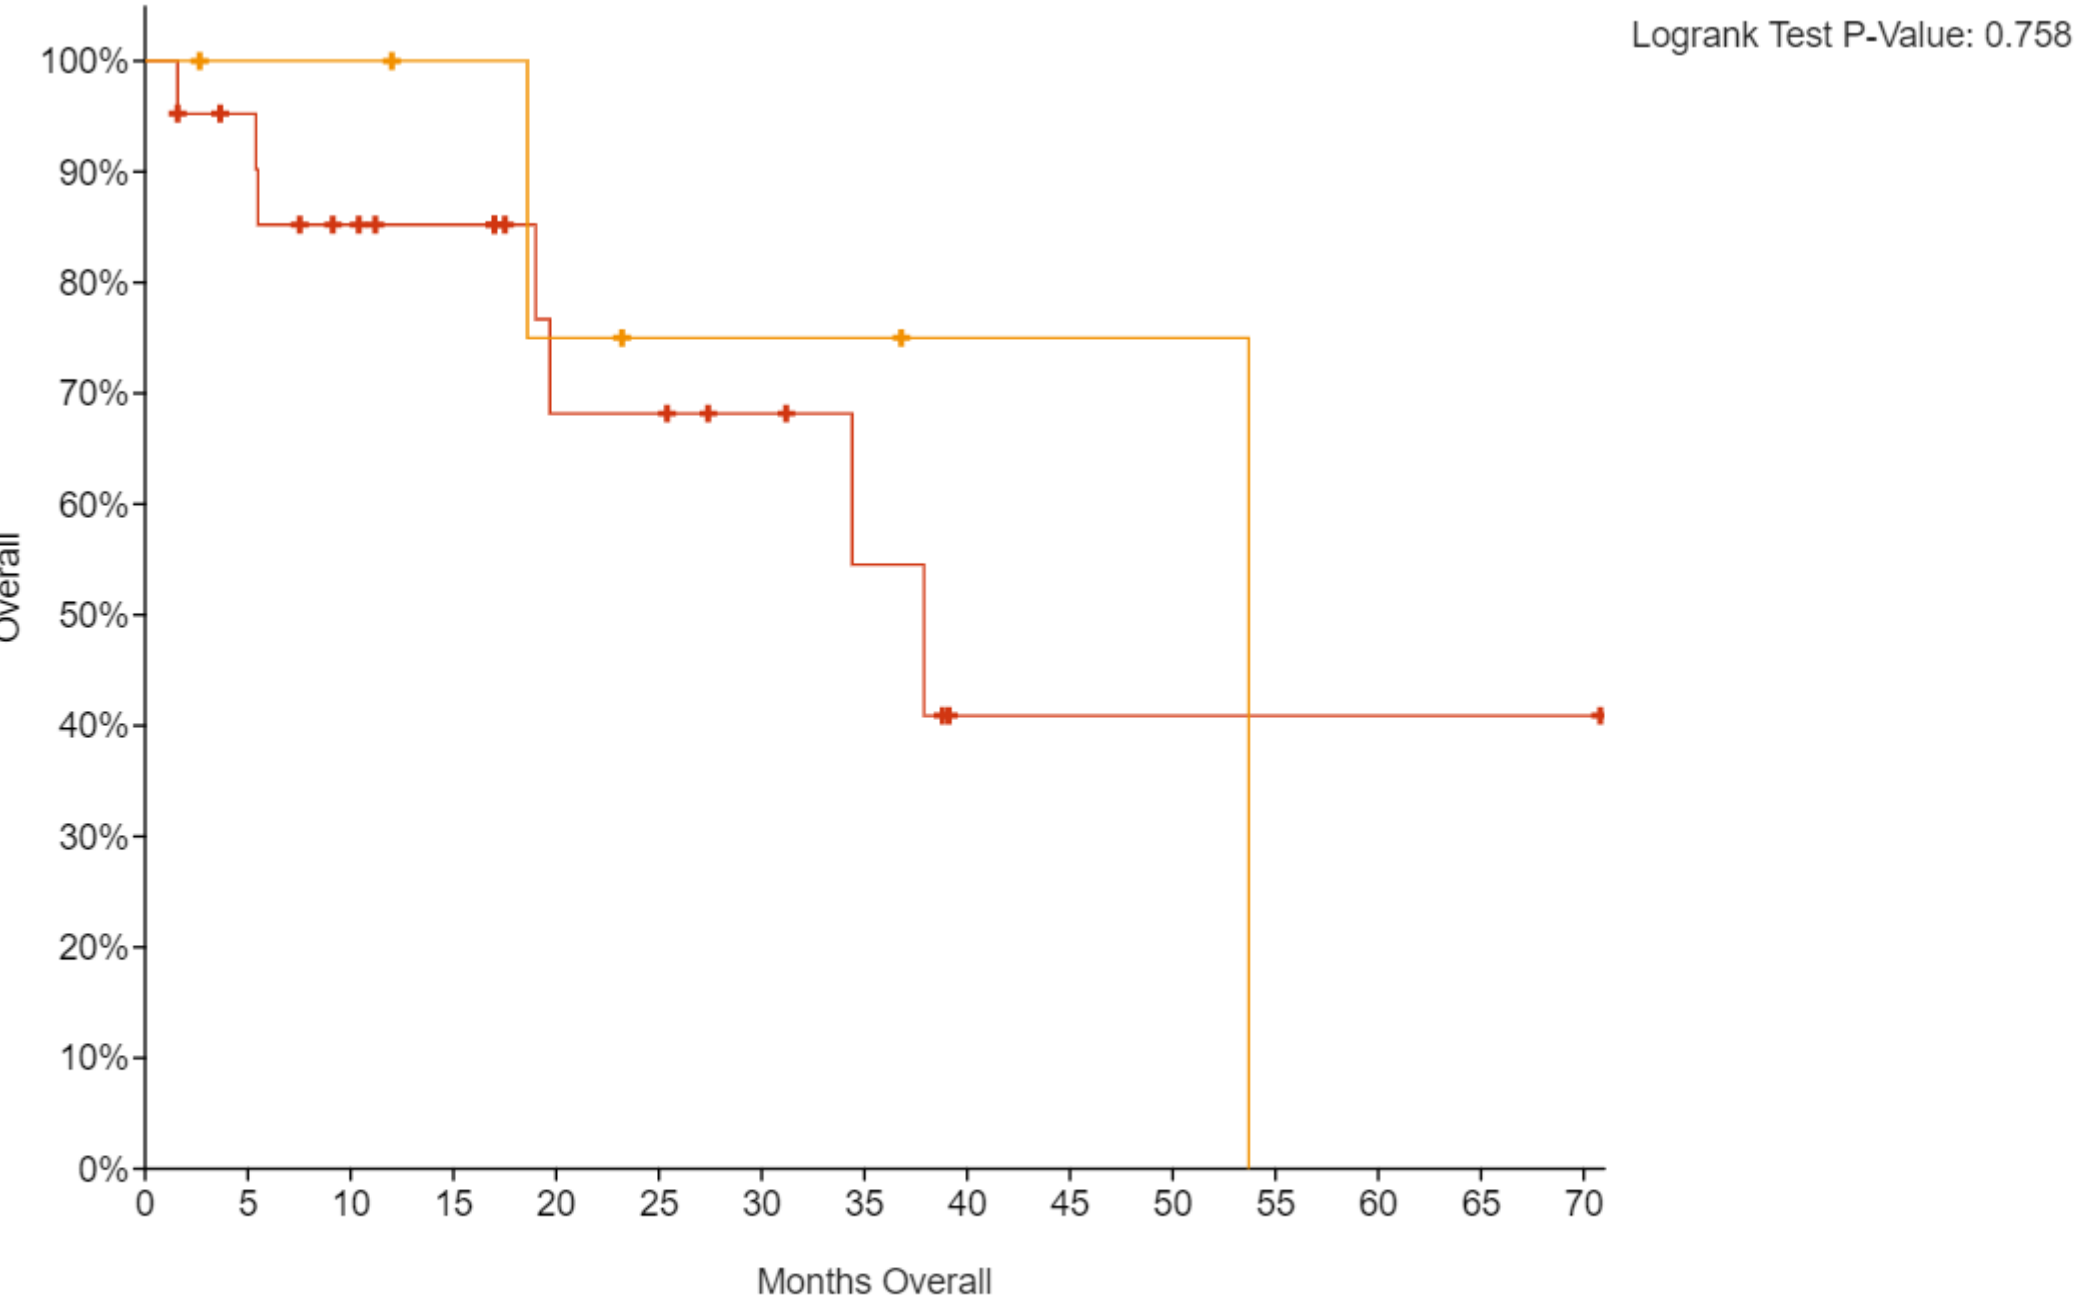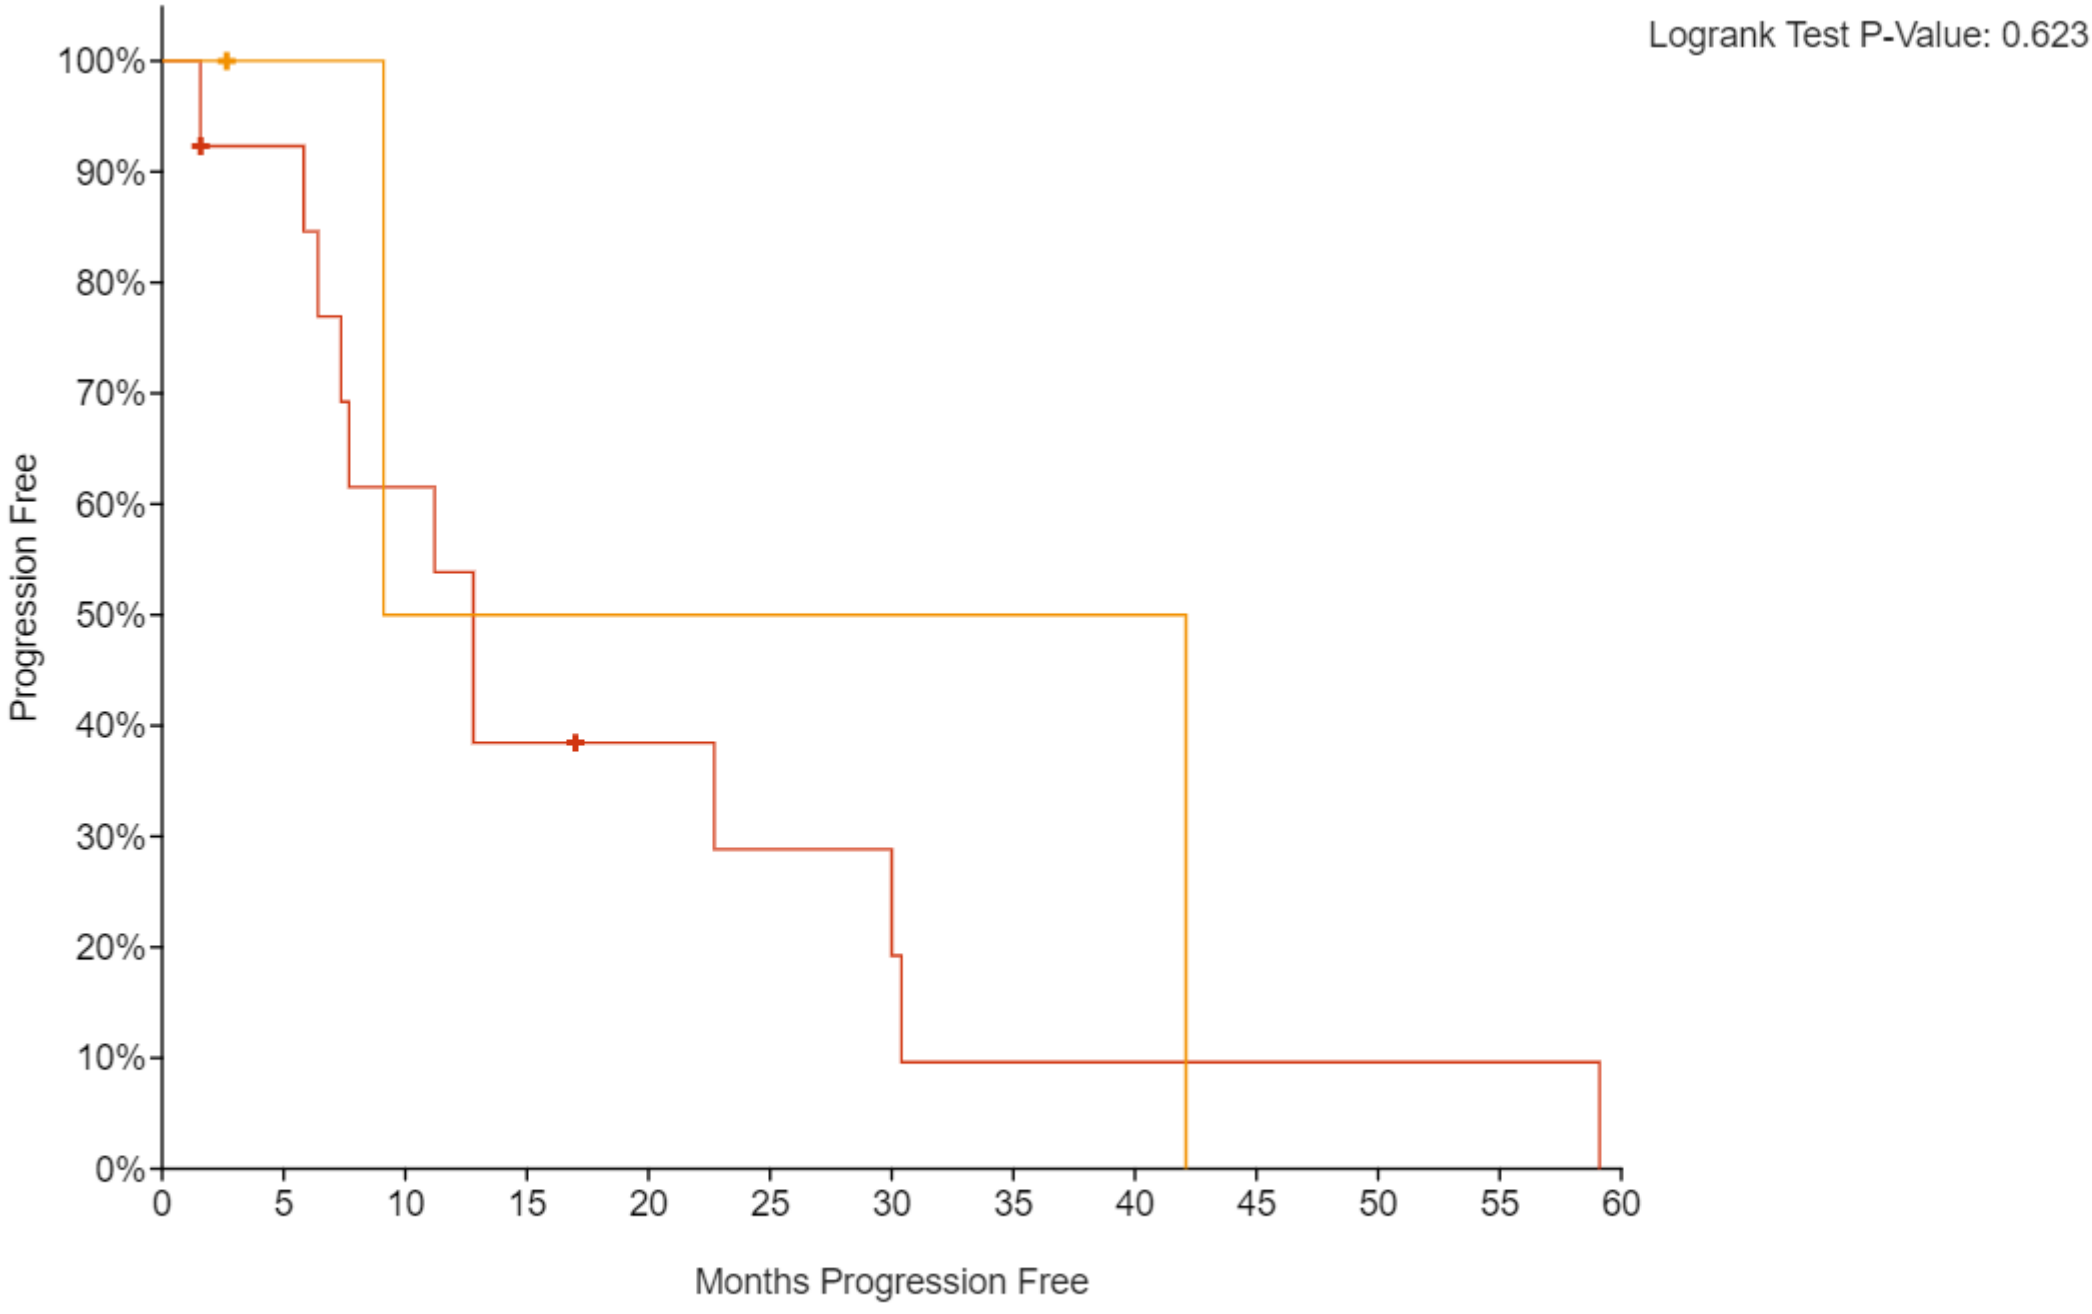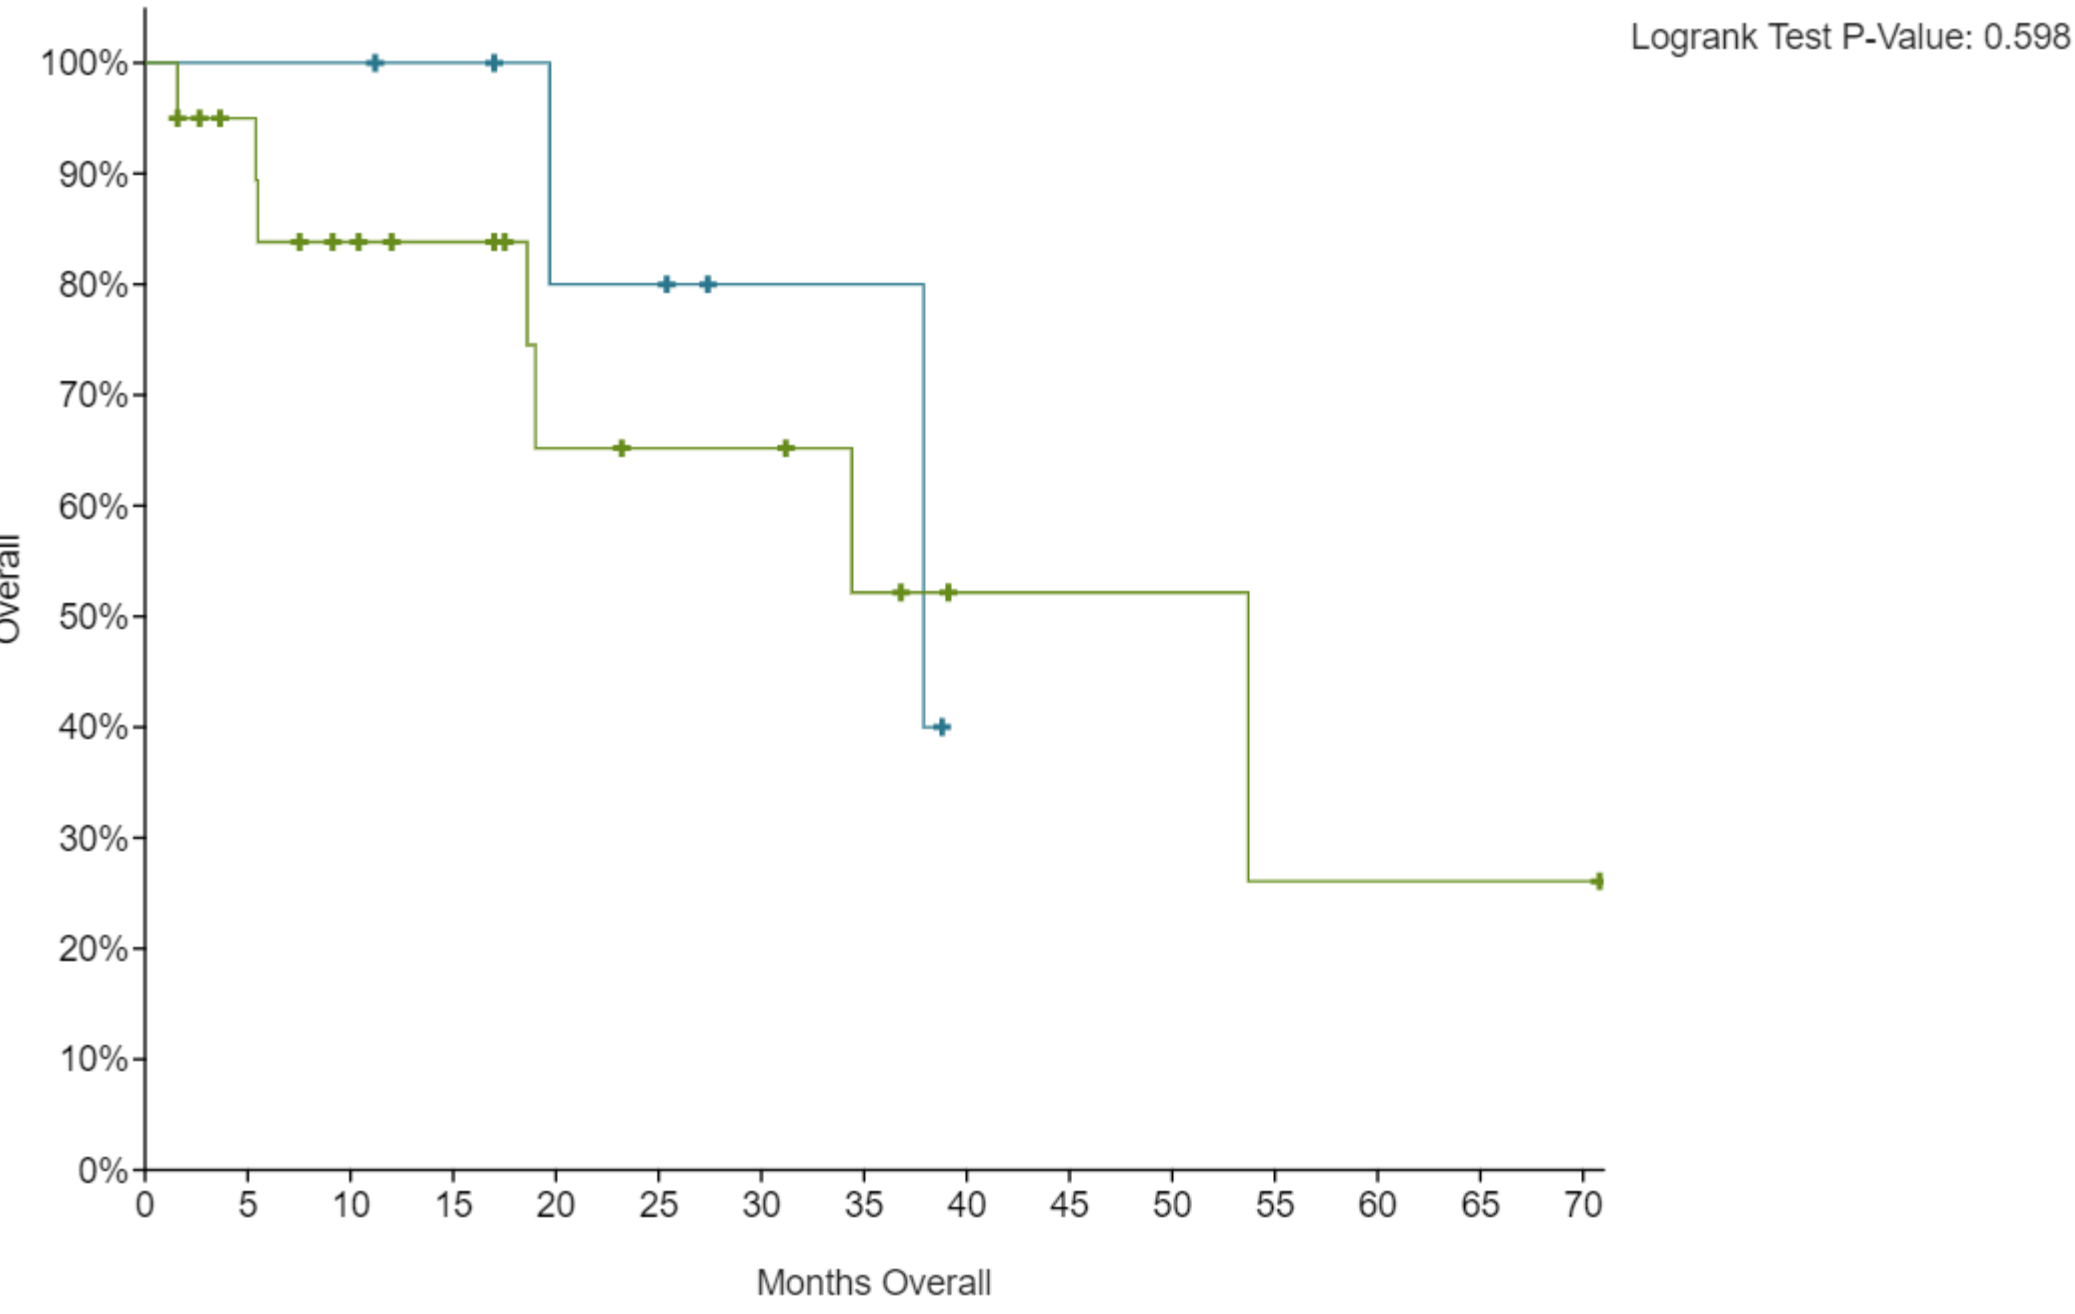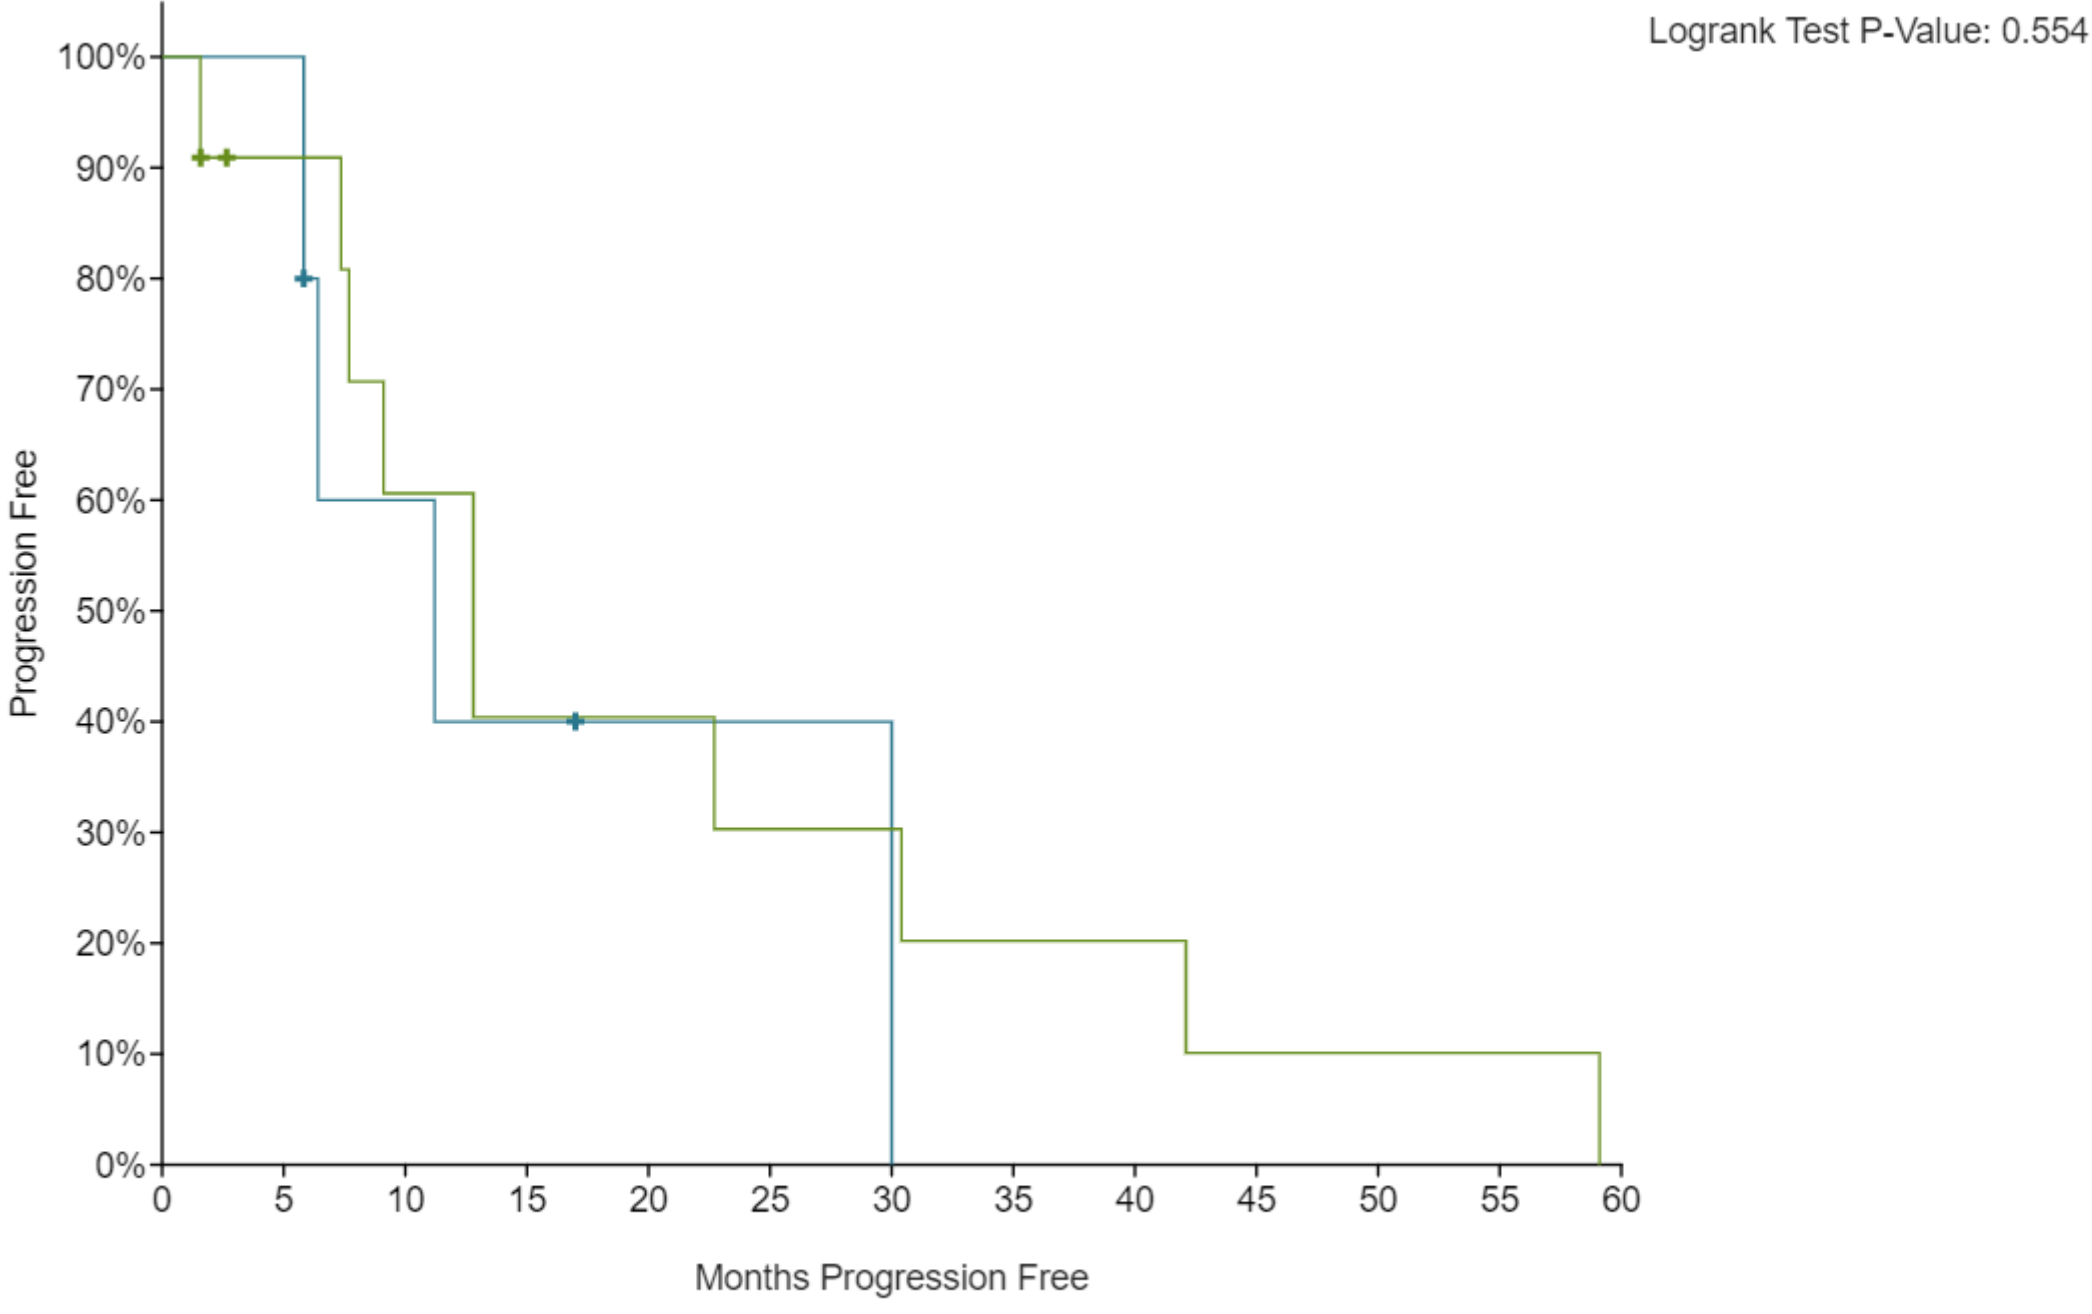

Supplementary Figure 4 – Telomere maintenance genes

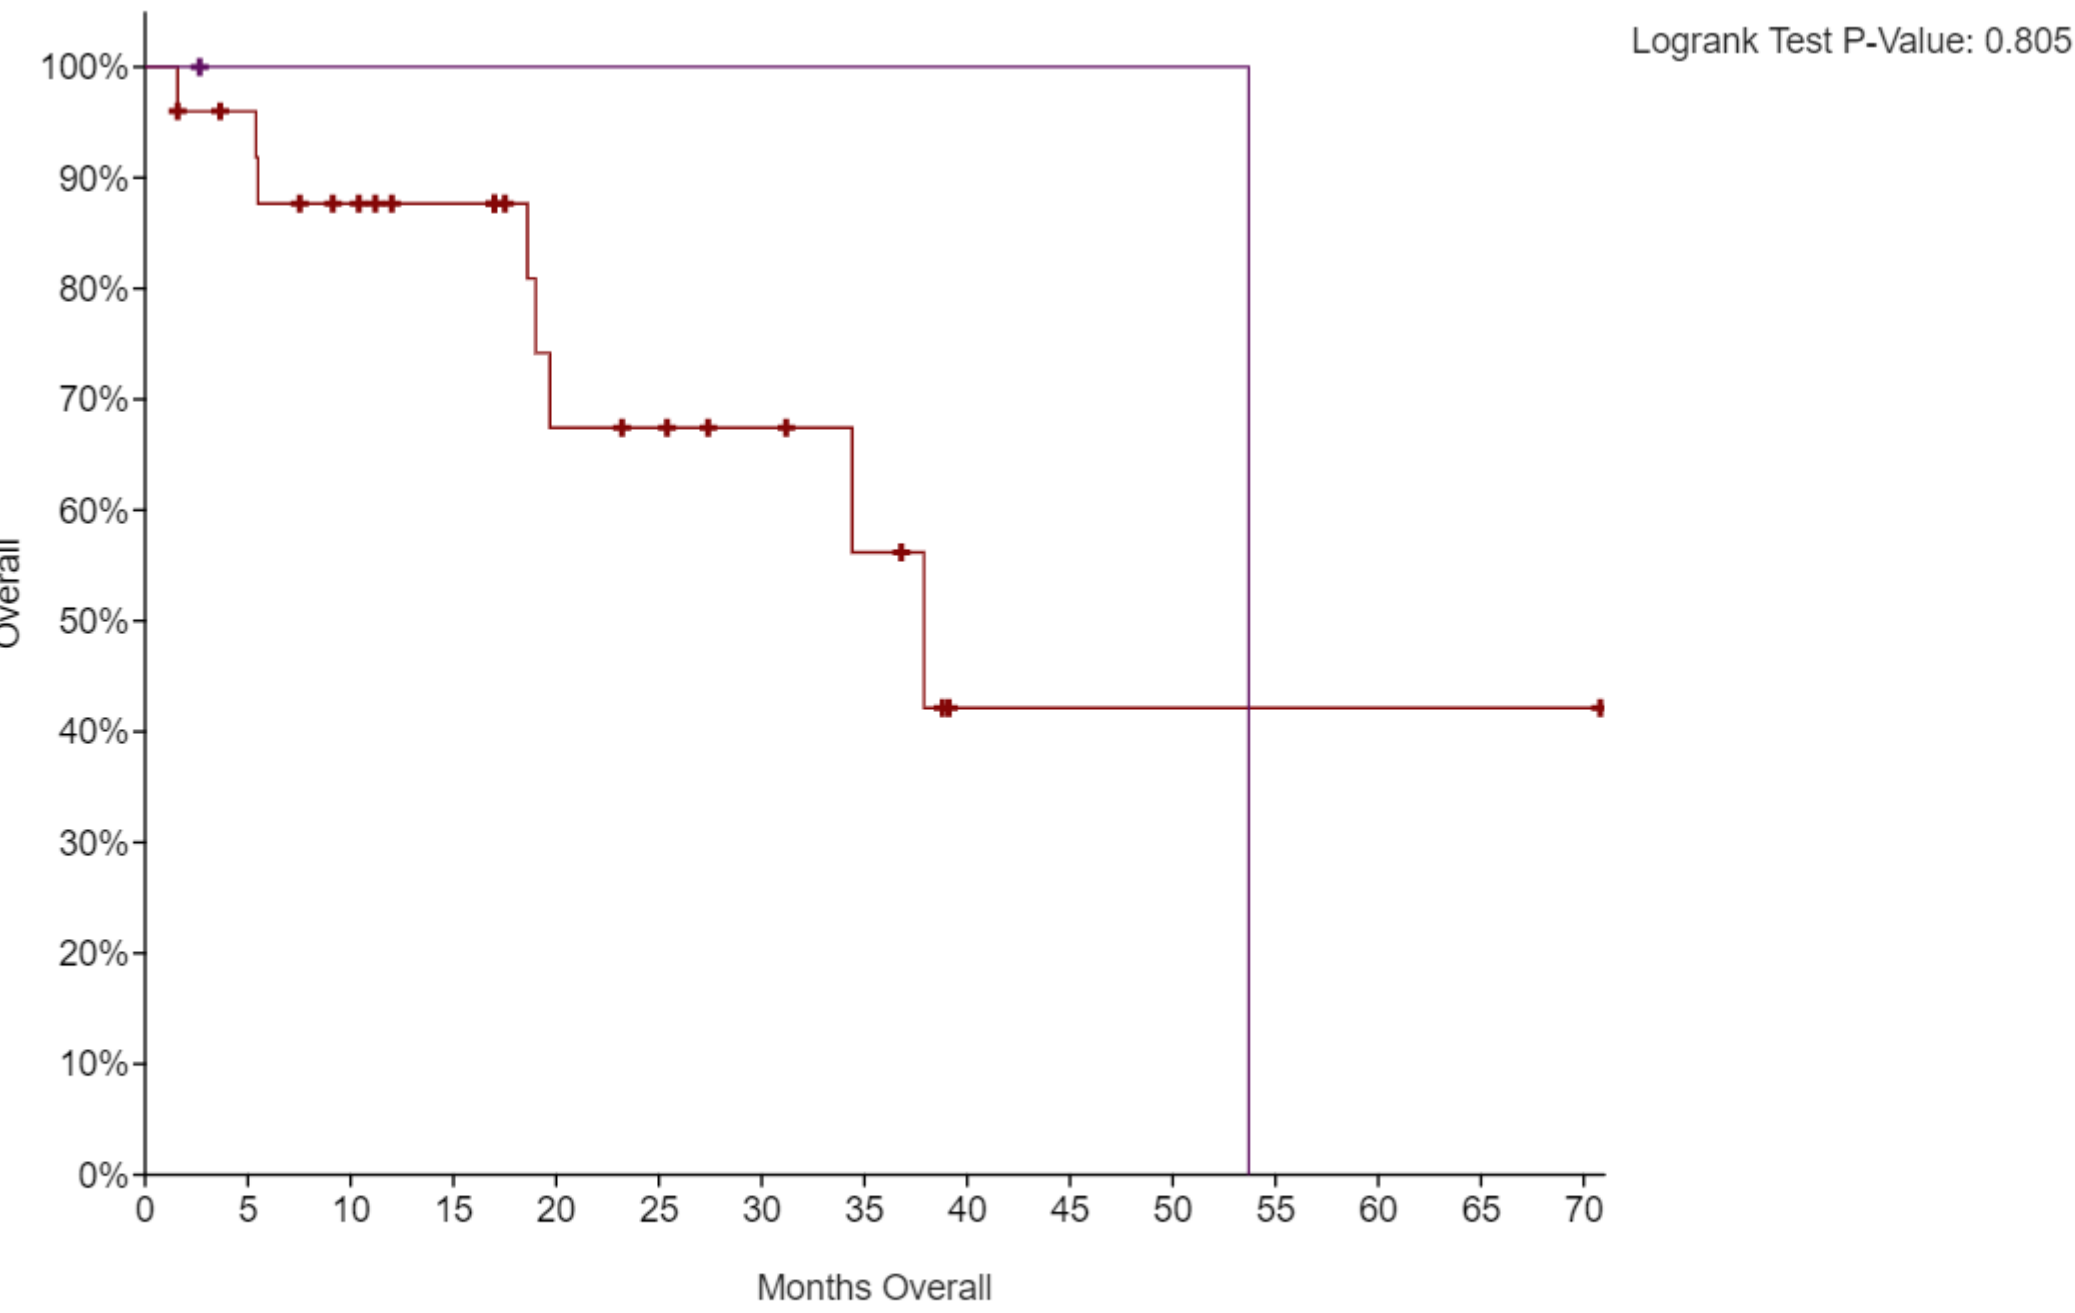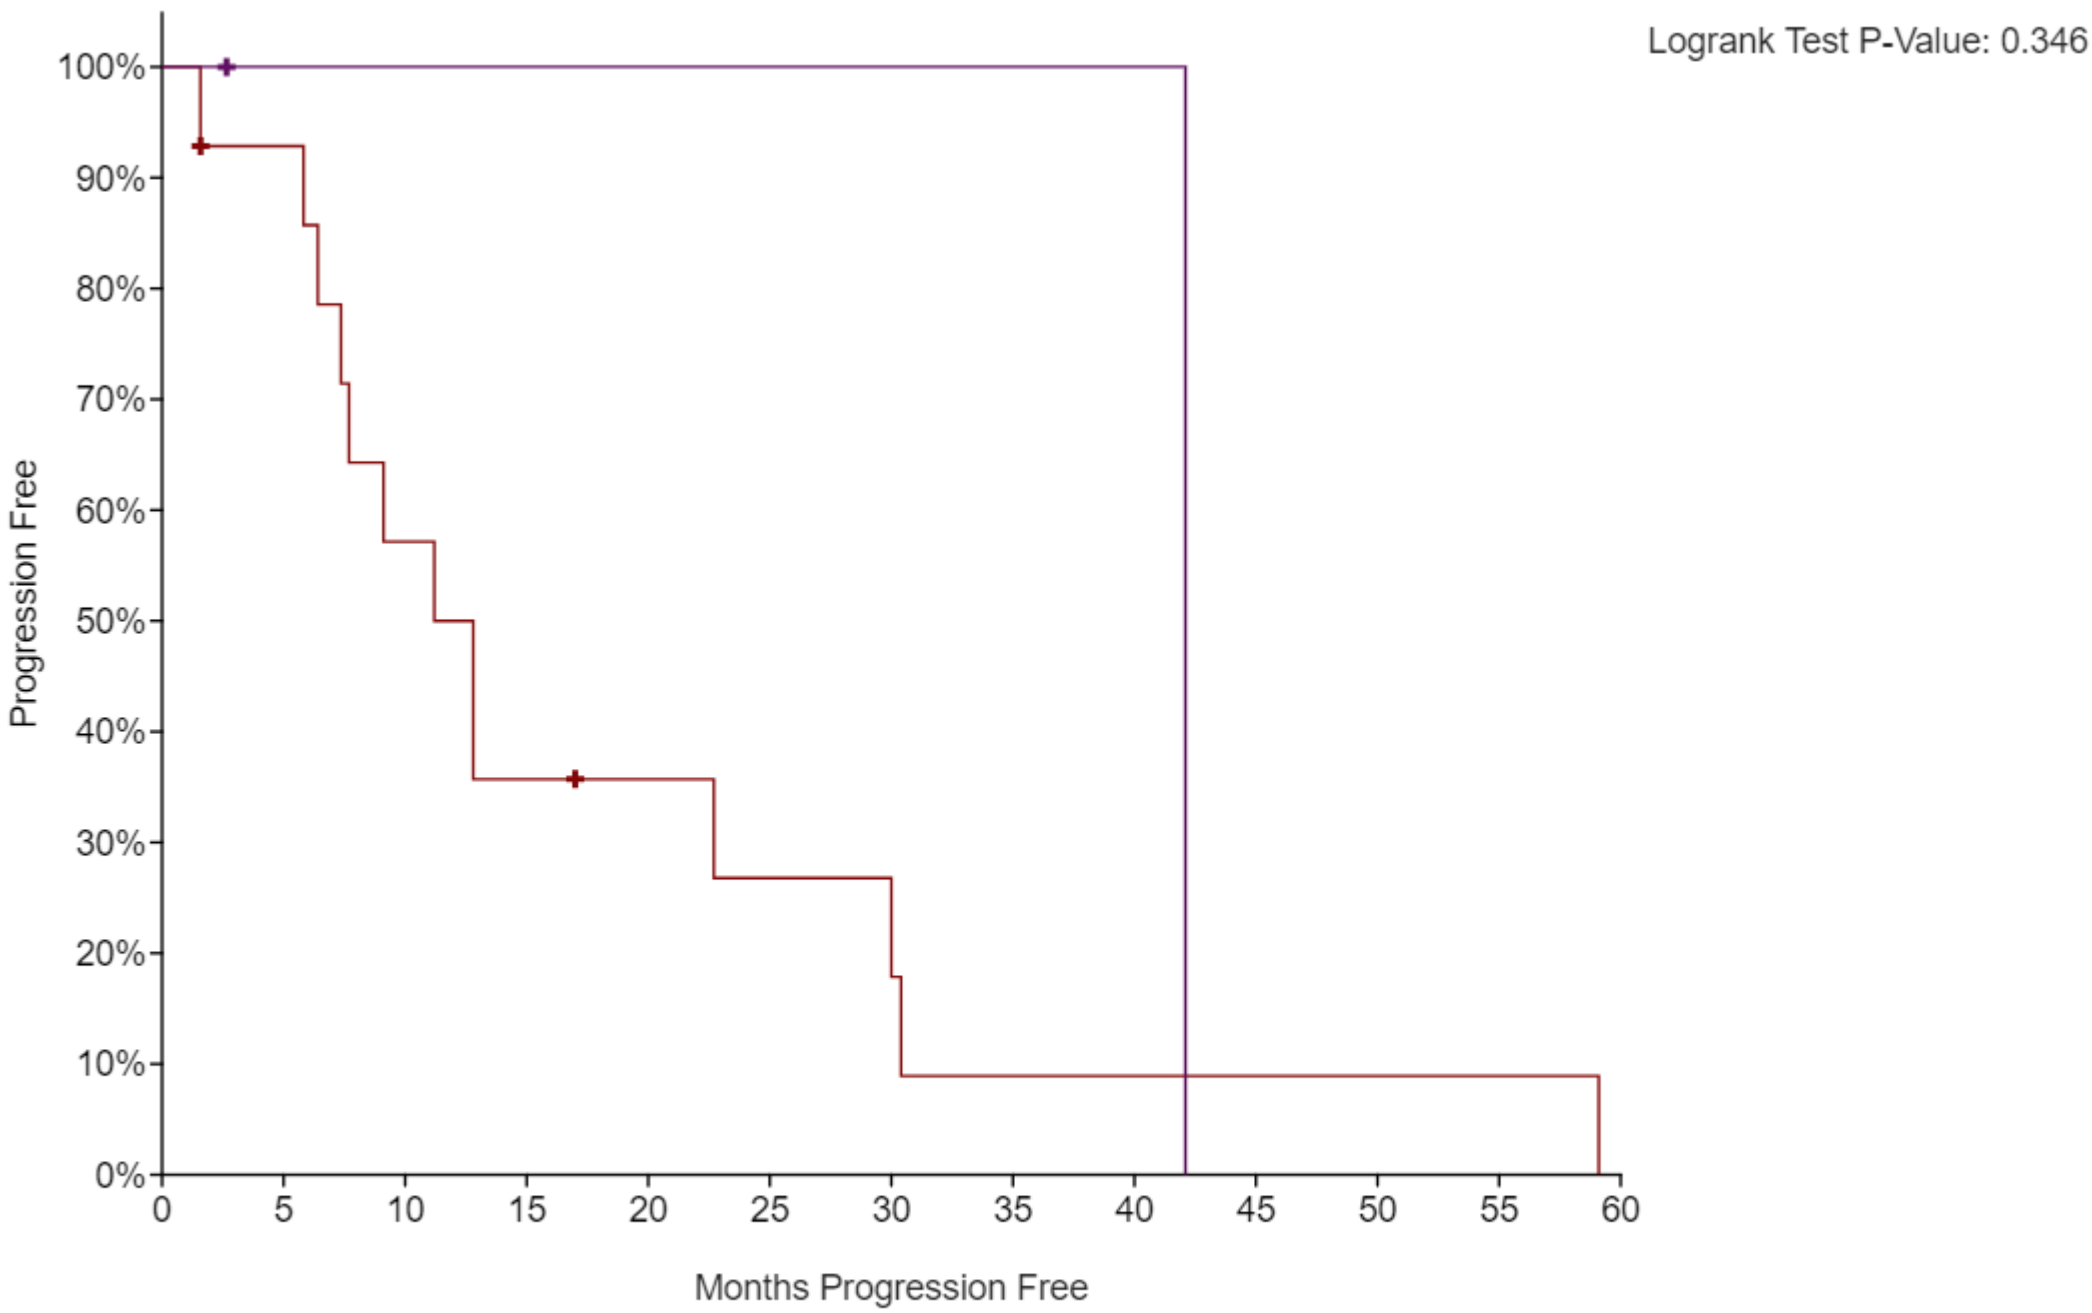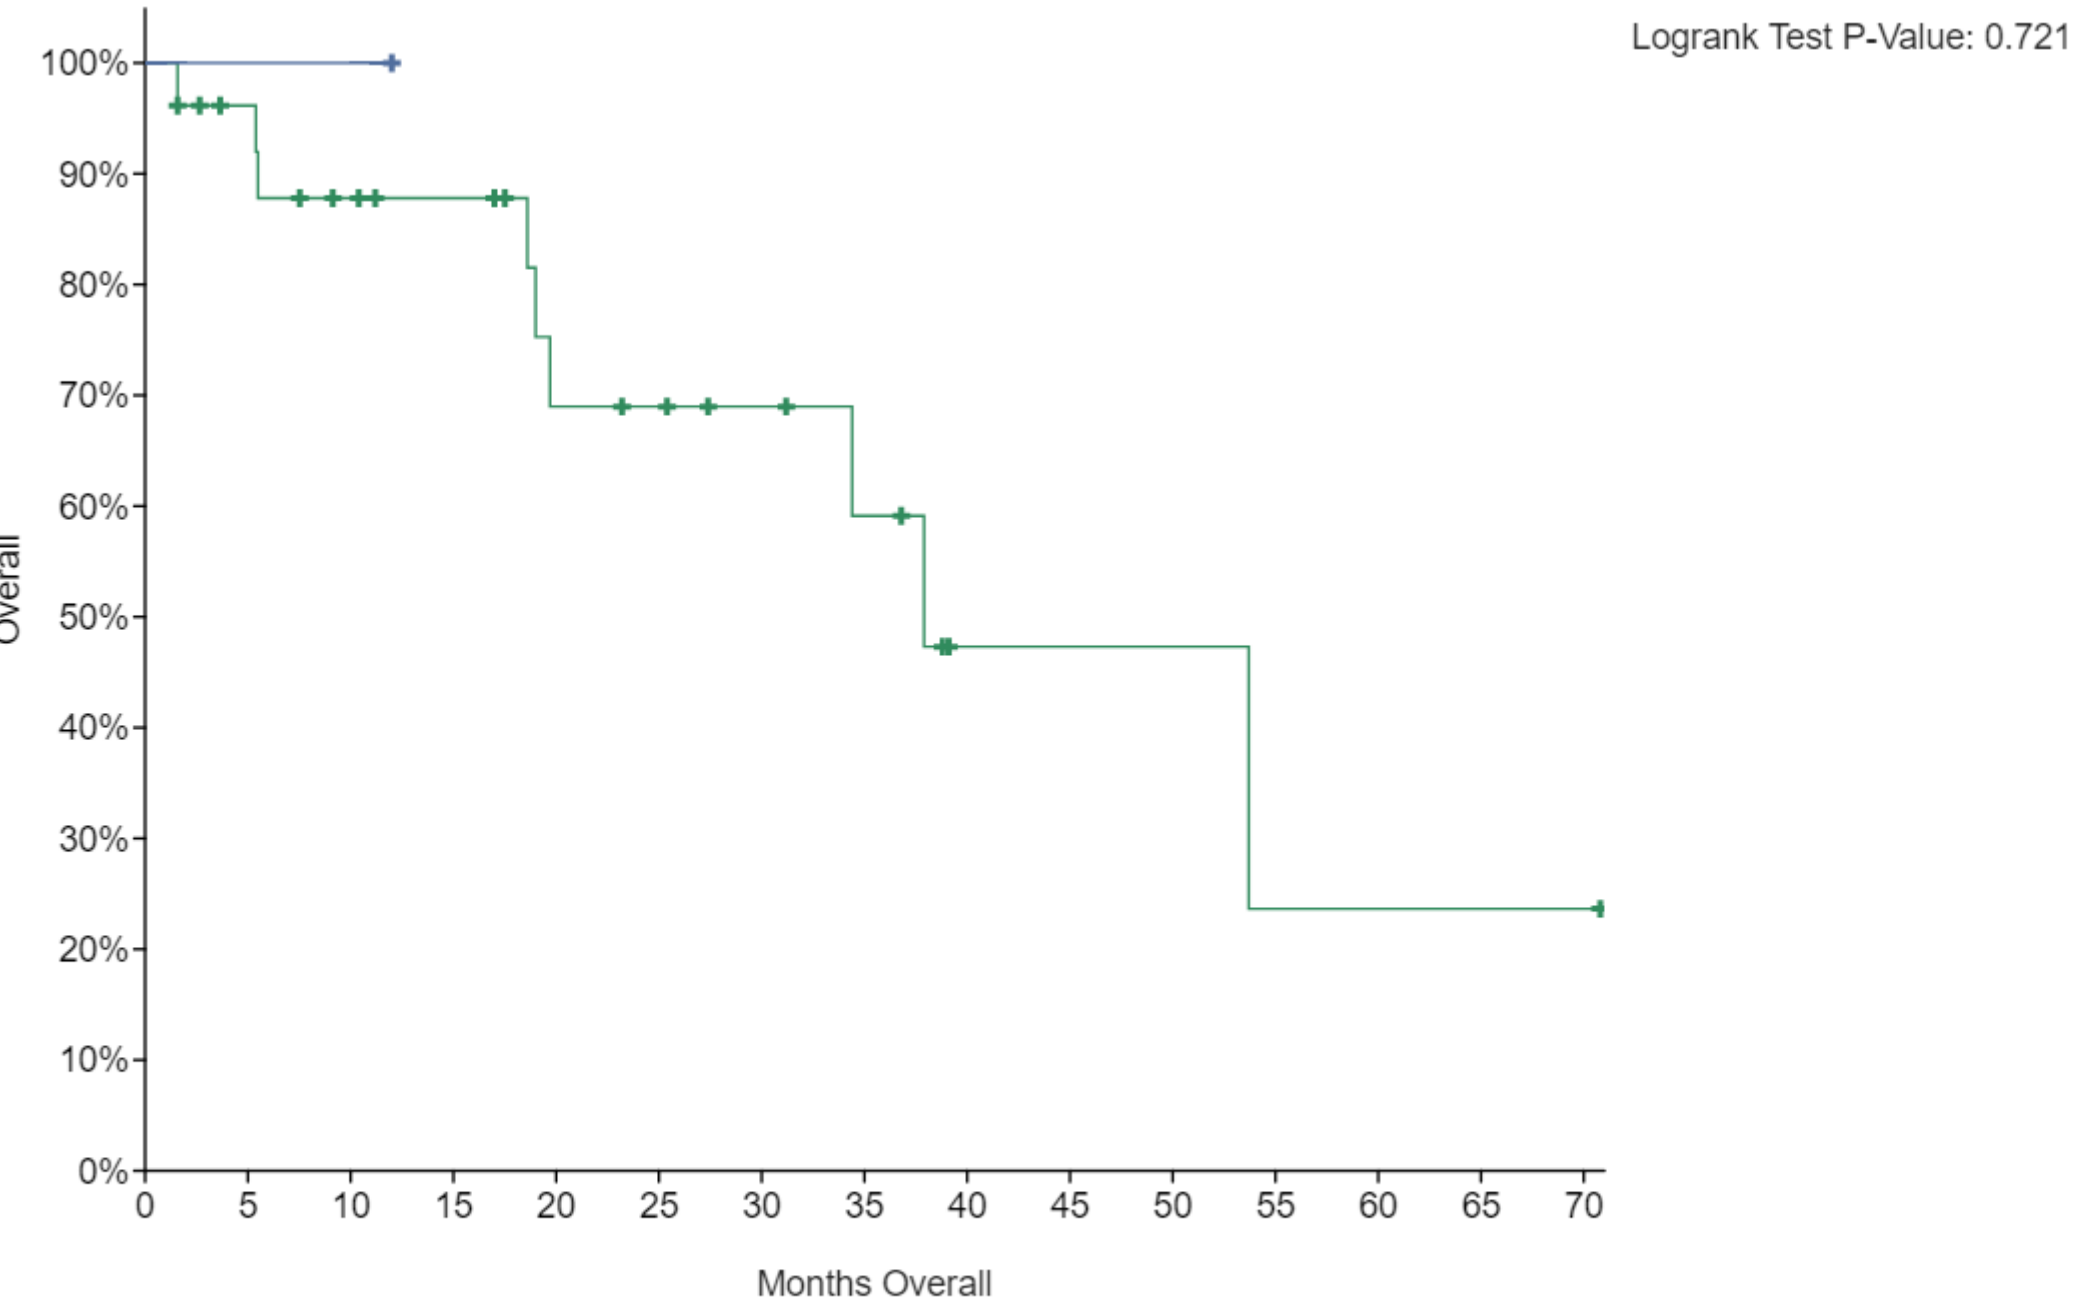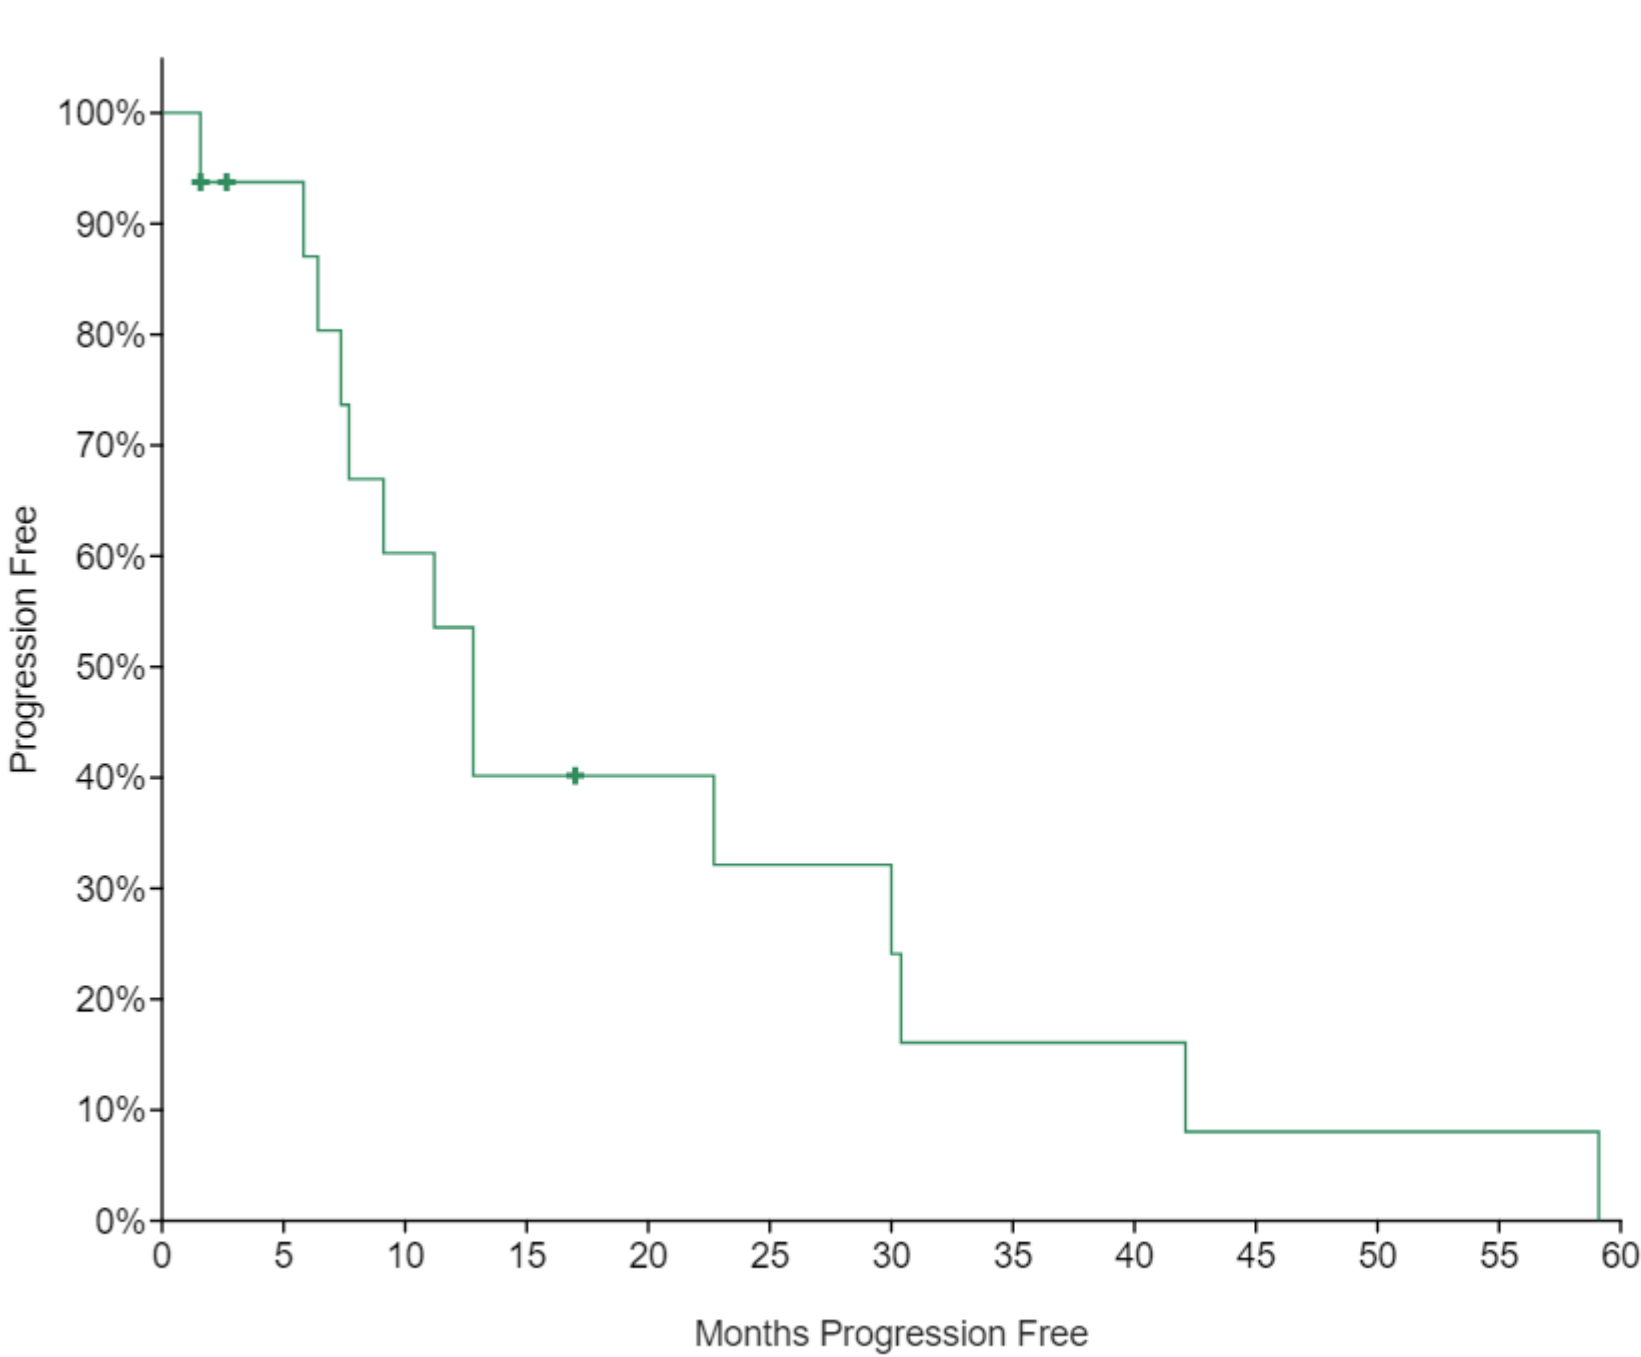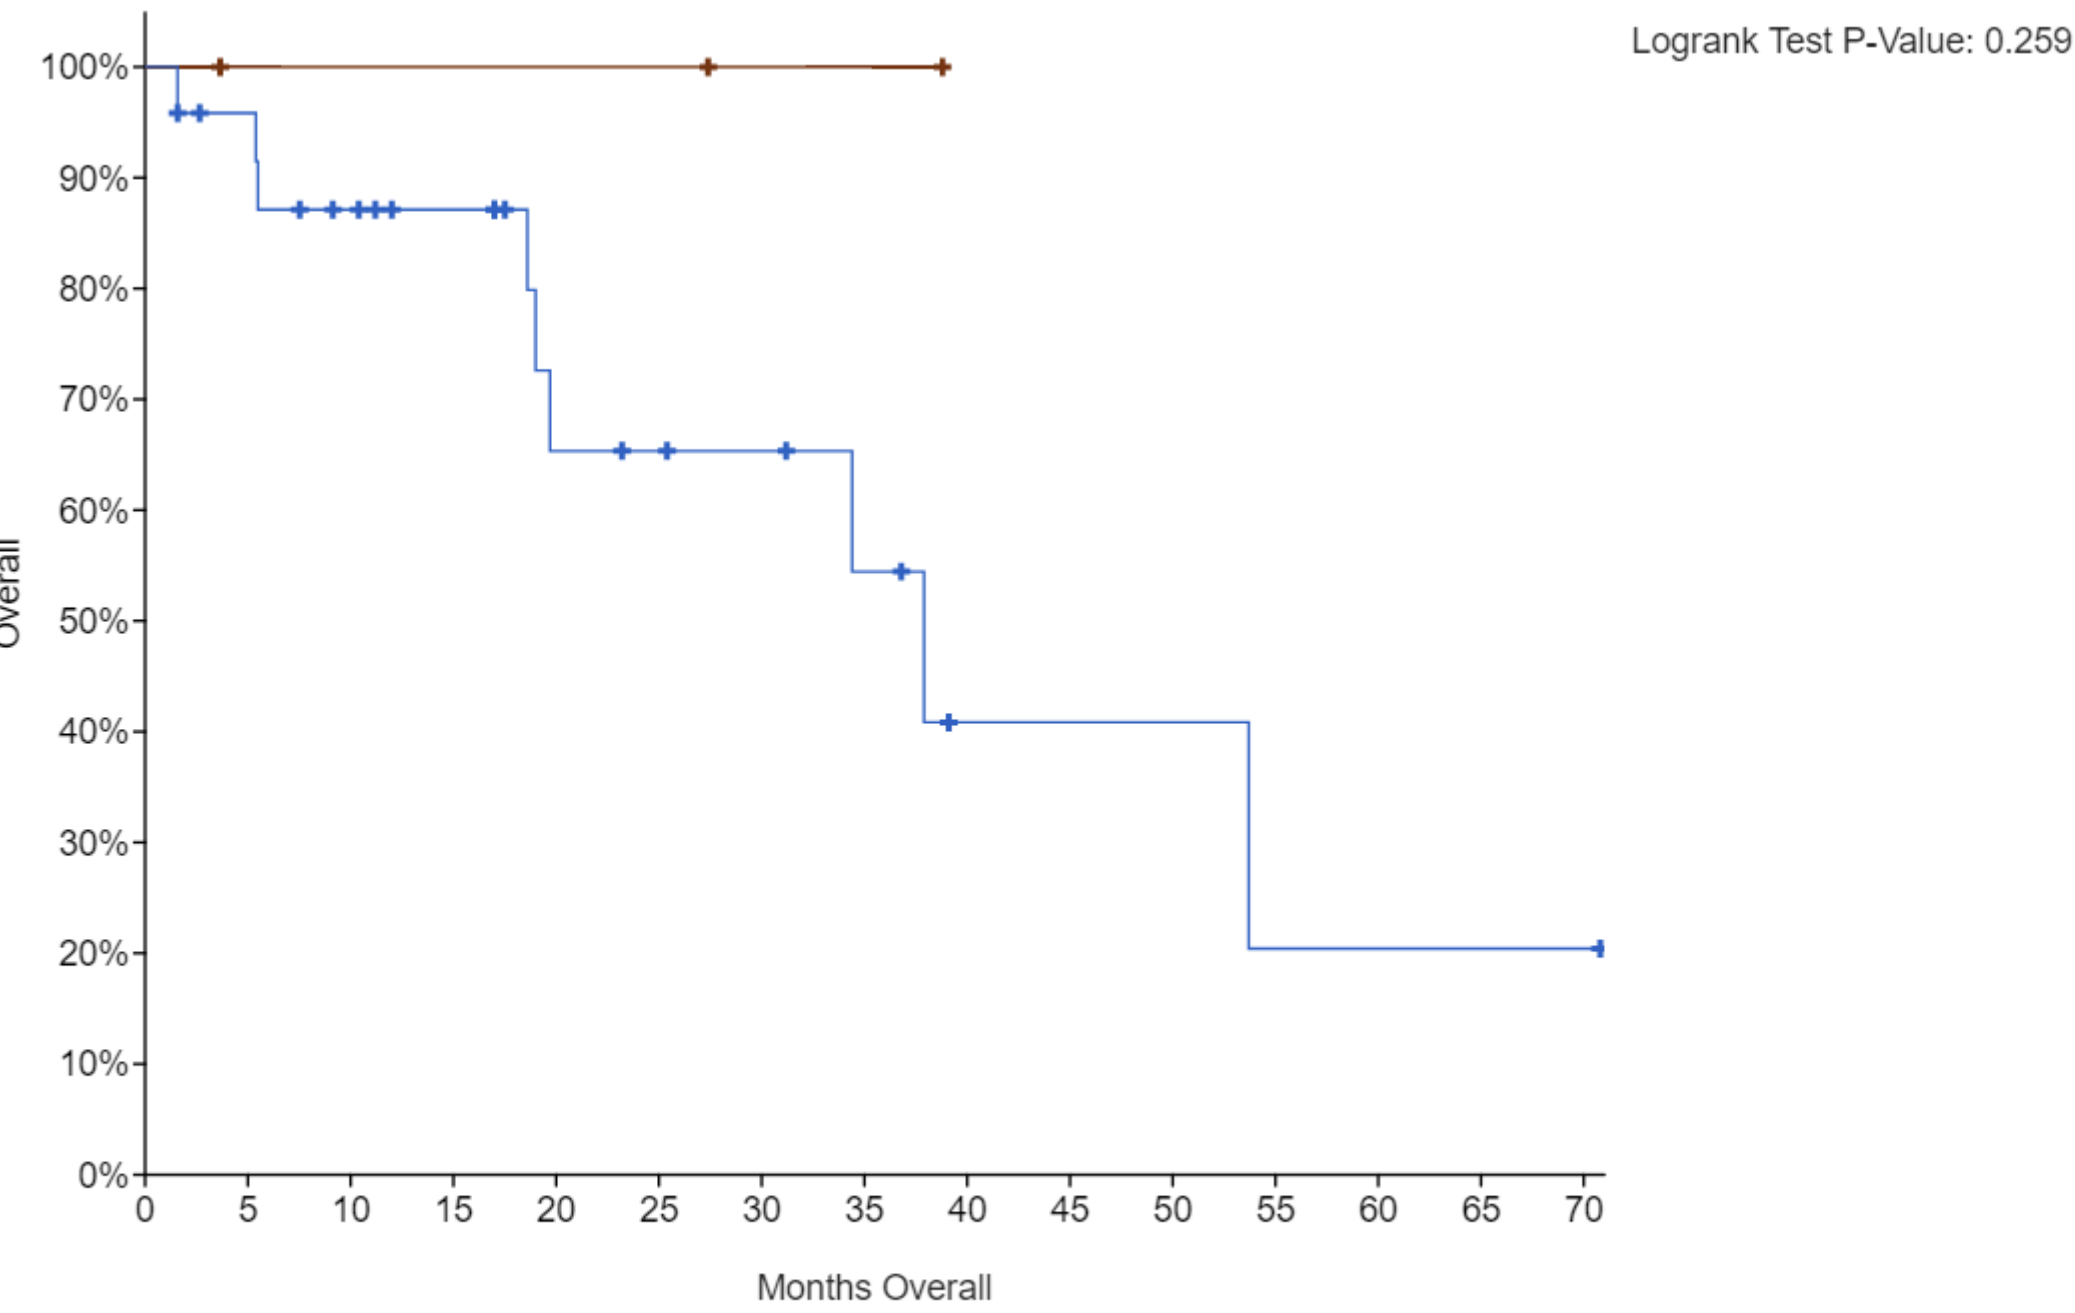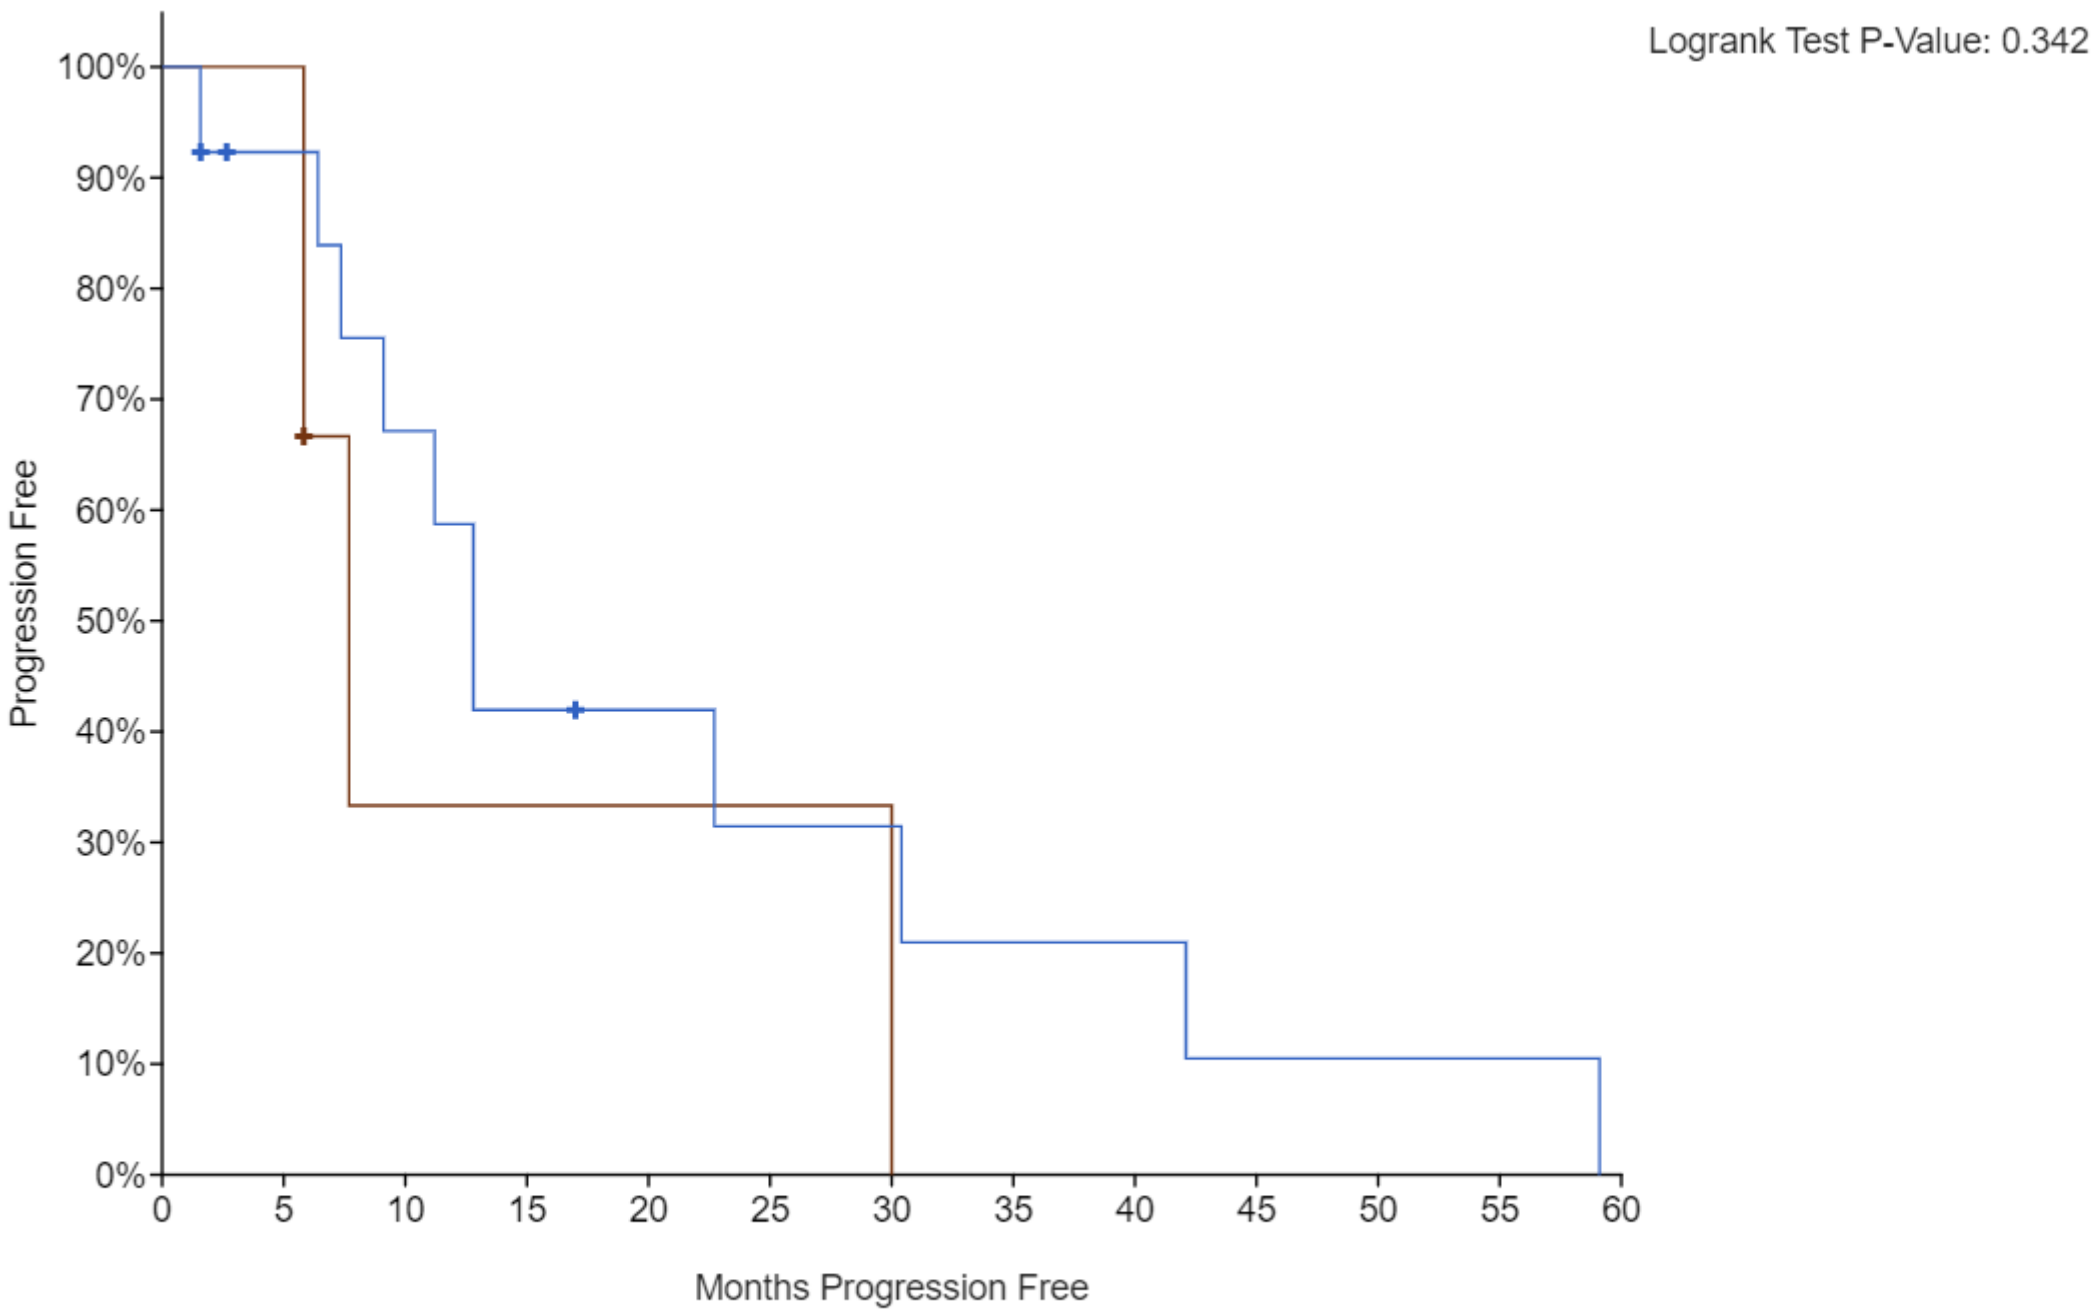

Supplement: Data_Sheet_1.PDF [file Data_Sheet_1.PDF]
